1 **Encephalitic alphaviruses exploit caveolae-mediated transcytosis at the blood-brain**  
2 **barrier for CNS entry**

3 Hamid Salimi<sup>1</sup>, Matthew D. Cain<sup>1</sup>, Xiaoping Jiang<sup>1</sup>, Robyn A. Roth<sup>1</sup>, Wandy Beatty<sup>1</sup>, Chengqun Sun<sup>2</sup>,  
4 William B. Klimstra<sup>2</sup>, Jianghui Hou<sup>1</sup>, Robyn S. Klein<sup>1,3,4</sup>

5 <sup>1</sup>Department of Medicine, Washington University School of Medicine, St. Louis, MO

6 <sup>2</sup>Department of Immunology and Center for Vaccine Research<sup>2</sup>, University of Pittsburgh, Pittsburgh, PA

7 <sup>3</sup>Department of Pathology & Immunology, Washington University School of Medicine, St. Louis, MO

8 <sup>4</sup>Department of Neuroscience, Washington University School of Medicine, St. Louis, MO

9

10 Correspondence should be addressed to R.S.K. ([rklein@wustl.edu](mailto:rklein@wustl.edu)).

11 Robyn S. Klein, M.D., Ph.D.

12 Washington University School of Medicine

13 Departments of Internal Medicine, Neurobiology,

14 Pathology & Immunology

15 Campus Box 8051

16 660 S. Euclid Ave

17 St. Louis, MO 63110

18 Phone: (314) 286-2140

19 Fax: (314) 362-9230

20 [rklein@wustl.edu](mailto:rklein@wustl.edu)

21 **Abstract**

22 Venezuelan and Western equine encephalitis viruses (VEEV and WEEV) invade the CNS early during  
23 infection, via neuronal and hematogenous routes (1, 2). While viral replication mediates host-shut off,  
24 including expression of type I interferons (IFN) (3, 4), few studies have addressed how alphaviruses  
25 gain access to the CNS during established infection or the mechanisms of viral crossing at the blood-  
26 brain barrier (BBB). Here, we show that hematogenous dissemination of VEEV and WEEV into the  
27 CNS occurs via caveolin (Cav)-1-mediated transcytosis (Cav-MT) across an intact BBB, which is  
28 impeded by IFN and inhibitors of RhoA GTPase. Use of reporter and non-replicative strains also  
29 demonstrates that IFN signaling mediates viral restriction within cells comprising the neurovascular unit  
30 (NVU), differentially rendering brain endothelial cells, pericytes and astrocytes permissive to viral  
31 replication. Transmission and immunoelectron microscopy revealed early events in virus internalization  
32 and Cav-1-association within brain endothelial cells. Cav-1-deficient mice exhibit diminished CNS  
33 VEEV and WEEV titers during early infection, whereas viral burdens in peripheral tissues remained  
34 unchanged. Our findings show that alphaviruses exploit Cav-MT to enter the CNS, and that IFN  
35 differentially restricts this process at the BBB.

36

37 **Importance**

38 VEEV, WEEV and EEEV are emerging infectious diseases in the Americas, and they have caused  
39 several major outbreaks in the human and horse population during the past few decades. Shortly after  
40 infection, these viruses can infect the CNS, resulting in severe long-term neurological deficits or death.  
41 Neuroinvasion has been associated with virus entry into the CNS directly from the blood-stream,  
42 however the underlying molecular mechanisms have remained largely unknown. Here we demonstrate  
43 that following peripheral infection alphavirus augments vesicular formation/trafficking at the BBB and  
44 utilizes Cav-MT to cross an intact BBB, a process regulated by activators of Rho GTPases within brain  
45 endothelium. *In vivo* examination of early viral entry in Cav-1-deficient mice revealed significantly lower  
46 viral burdens than in similarly infected wild-type animals. These studies identify a potentially targetable  
47 pathway to limit neuroinvasion by alphaviruses.

48

49

## 50 Introduction

51 The central nervous system (CNS) is protected from pathogens by the blood brain barrier (BBB), an  
52 intercellular association of transmembrane junctional proteins between brain microvascular endothelial  
53 cells (BMECs), with associated pericytes, astrocytes and neurons that together comprise the  
54 neurovascular unit (NVU) (5). Neurotropic pathogens have evolved mechanisms to bypass or cross this  
55 barrier, including anterograde or retrograde transport along axons, destabilization of BBB junctional  
56 proteins, or passage through BMECs (6), the latter of which may involve intracellular transport within  
57 leukocytes via binding to intercellular adhesion molecule (ICAM)-1 (7). An additional mechanism may  
58 involve caveolae, flask-shaped plasma membrane invaginations within BMECs that are important for  
59 cell metabolism, signal transduction, and the transcytosis of large proteins (8). BBB formation of  
60 caveolae, which contain the major structural protein caveolin-1 (Cav-1), is limited by the major facilitator  
61 superfamily domain-containing protein 2a (Mfsd2a), which is exclusively expressed on BMECs and  
62 induced by pericytes (9). Stabilization of junctional proteins and caveolae within BMECs is additionally  
63 regulated by the small Rho GTPases, including the Ras homolog gene family, member A (RhoA), and  
64 Ras-related C3 botulinum toxin substrate (Rac)-1 (10). While many viruses have evolved to interact  
65 with Rho GTPases to increase their entry and replication within target cells (11, 12), some neurotropic  
66 viruses, including retroviruses and flaviviruses, may compromise BBB permeability via GTPase-  
67 mediated alterations of junctional proteins (13–16). For these viruses, neuroinvasion coincides with  
68 BBB instability. In contrast, encephalitic alphaviruses, including Venezuelan, Western and Eastern  
69 equine encephalitis viruses (VEEV, WEEV and EEEV, respectively), can enter the CNS directly from  
70 the bloodstream via unknown mechanisms (17, 18).

71 VEEV, WEEV, EEEV naturally cycle between mosquitoes and birds (EEEV and WEEV),  
72 mosquitoes and rodents (VEEV enzootic cycle), or mosquitoes and horses (VEEV epizootic cycle), and



73 are all widely distributed in North, Central, and South America (19). Human infection can progress  
74 rapidly to encephalitis with fatality rates of 1-75%, depending on the strain. Of the three, VEEV is  
75 considered the most important zoonotic pathogen with several reported outbreaks in South and Central  
76 Americas, the latter of which have spread to North America. Although the number of human cases  
77 reported is small, the possibility for disease emergence is high due to expansion and spread of  
78 mosquito vectors (20). Despite the epidemic potential of VEEV and the high morbidity and/or case  
79 fatality rates of EEEV and WEEV, there are no approved vaccines or therapeutics for humans. Insight  
80 into the cell-intrinsic and -extrinsic processes by which the host limits alphavirus infections and  
81 minimizes virus- and immune-induced injury is essential for developing strategies to contain virus  
82 dissemination and disease. While early studies suggested that VEEV enters the CNS via anterograde  
83 transport along peripheral nerves after cutaneous inoculation (1), recent findings, however, emphasize  
84 that VEEV may cross the BBB via unknown mechanisms (2, 21).

85 In this study, we show that peripherally inoculated virulent strains of VEEV and WEEV enter the  
86 CNS from the blood-stream as free virions through an intact BBB. While VEEV and WEEV interact,  
87 enter and traverse brain endothelium *in vivo*, virus replication within brain microvascular endothelial  
88 cells (BMECs) and pericytes is inhibited by type I IFN (IFN) signaling. Consistent with this, reporter and  
89 non-replicative strains of VEEV and WEEV were observed to first replicate within astrocytes and  
90 neurons, respectively, suggesting that alphaviruses cross the BBB without replication in BMECs or  
91 pericytes. Using an *in vitro* transcytosis assay, alphaviruses were found to utilize caveolin-mediated  
92 transcytosis (Cav-MT), which is directly regulated by small Rho GTPases, and, notably, IFN.  
93 Transmission and immunoelectron microscopy revealed *in vivo* virus encounter and entry at the BBB,  
94 with detection of VEEV within caveolin-1-expressing BMECs. Importantly, deficiency in *Cav-1*  
95 significantly delayed alphavirus neuroinvasion during early infection, highlighting the important role of

96 caveolae in CNS entry. Together, these data suggest that IFNs regulate the CNS entry of encephalitic  
97 alphaviruses via direct and indirect mechanisms.  
98

99 **Results**

100 **Alphavirus neuroinvasion occurs prior to BBB disruption.** To address mechanisms of alphavirus  
101 neuroinvasion in susceptible hosts, we infected mice with enzootic VEEV ZPC738 (VEEV) and  
102 epizootic WEEV McMillan (WEEV) strains of alphaviruses (22, 23). Wild-type mice infected with VEEV  
103 and WEEV via footpad (f.p.) inoculation exhibited detectable virus replication simultaneously in both  
104 fore- and hindbrain regions at 1- and 3-days post-infection (dpi), respectively (Fig. 1A and B). Similar  
105 results were observed in the brainstem and spinal cord (Fig. S1A-D). Consistent with prior studies, the  
106 olfactory bulb exhibited higher VEEV titers at early time-points (1). Viral titers plateaued at  $10^7$  to  $10^8$   
107 pfu/g of tissue by 3-4 dpi (VEEV) and 4-5 dpi (WEEV). Significant alterations in BBB permeability  
108 occurred at plateau viral loads, with VEEV infection leading to higher permeability in all brain regions as  
109 compared to WEEV (Fig. 1C and D). Peak BBB permeability in the brainstem and spinal cord also  
110 occurred at time-points coinciding with peak viral loads (Fig. S1C and D). We also examined direct  
111 effects of virus on BBB integrity using an *in vitro* BBB model, in which primary murine BMECs are  
112 cultured on transwell inserts over primary murine astrocytes in the bottom chamber (Fig. 1E). In this  
113 model, barrier integrity is assessed by measuring transendothelial electrical resistance (TEER) between  
114 the transwell chambers. While control cultures treated with TNF- $\alpha$  (100 ng/ml) displayed decreased  
115 TEER at all time-points, addition of virus to either BMECs or astrocytes had no effect on TEER (Fig. 1F  
116 and G). Together, our observations from *in vivo* and *in vitro* experiments suggest that alphavirus  
117 neuroinvasion occurs in the presence of an intact BBB.

118

119 **Hematogenous route of neuroinvasion is not exclusive to the circumventricular organs (CVOs).**  
120 Viral neuroinvasion across an intact BBB could occur via virus replication within cellular constituents of  
121 the NVU. To assess viral permissivity of NVU cells, we examined *in vitro* alphavirus infection of isolated

122 murine cells and performed multistep growth curve analyses after infection with either VEEV (Fig. S2A-  
123 C) or WEEV (Fig. S2E-G). While all cell types were permissive to both viruses, slopes of the curves  
124 differed; thus, virus replication plateaued as early as 6-12 hours post-infection (hpi) in astrocytes, while  
125 pericytes and BMECs required 12-24 hpi and 24-48 hpi, respectively, to reach plateau levels. To  
126 validate these findings in murine BMECs, the experiment was performed using the human brain  
127 endothelial cell line, hCMEC/D3, which displayed similar results (Fig S1H and L). These data suggest  
128 that differential restriction of alphavirus replication may occur at the NVU. To examine this *in vivo* during  
129 early viral neuroinvasion, we infected mice with  $10^6$  pfu of either VEEV-eGFP or WEEV-eGFP via  
130 intravenous (i.v.) injection, followed by immunohistochemical (IHC) detection of GFP within brain  
131 tissues. Given the two-day delay in detection of WEEV compared with VEEV within the CNS (Fig. 1)  
132 CNS tissues of VEEV-infected mice were examined at 16 hpi, while WEEV-infected mice were  
133 examined at 48 hpi. Analyses of brains revealed multiple foci of viral replication throughout the brain for  
134 both viruses, suggesting hematogenous routes of CNS entry. While some of the entry sites overlapped  
135 with areas consistent with CVOs (Fig. 2A and B; arrows) (2), others were located within cortical and  
136 cerebellar areas that are distant from these structures (Fig. 2A and B; arrow heads). In VEEV-infected  
137 mice, GFP expression was detected in both NeuN<sup>+</sup> neurons and S100-β<sup>+</sup> astrocytes (Fig. 2C). In  
138 contrast, WEEV-infected animals exhibited GFP expression exclusively within neurons (Fig. 2D).  
139 Notably, neither reporter strain led to early viral replication within BMECs or pericytes (Fig. 2C and D),  
140 which is consistent with their diminished permissivity *in vitro* compared with astrocytes. Together, these  
141 data suggest that cells of the NVU are differentially susceptible to alphavirus infection *in vivo* and that,  
142 upon viremia, alphaviruses invade the CNS from the bloodstream through multiple entry sites that are  
143 not exclusive to CVOs.

144

145 **IFNAR signaling differentially restricts alphavirus infection at the BBB.** Given our results  
146 demonstrating differential *in vivo* replication of alphaviruses within cells of the NVU, we hypothesized  
147 that robust post-entry restriction may be imposed by innate immune responses within BMECs and  
148 pericytes. To address this, WT and *Ifnar*<sup>-/-</sup> mice were infected with VEEV-eGFP (100 pfu) via f.p.  
149 inoculation, and brain tissues were examined at 1 dpi for GFP expression. Notably, *Ifnar*<sup>-/-</sup> mice  
150 succumb to VEEV-eGFP by ~30 hr post infection (Fig. S3A), while WT animals have undetectable brain  
151 infection using IHC at this time-point (Fig S3D). Thus, to allow comparisons at similar viral burdens (Fig.  
152 S3C), we also evaluated brain tissues of WT mice at 3 dpi. VEEV infection was limited to S100-β<sup>+</sup>  
153 astrocytes and NeuN<sup>+</sup> neurons in WT animals (Fig. 3A and Fig. S4A), whereas similar infection in *Ifnar*<sup>-/-</sup>  
154 <sup>-/-</sup> animals led to GFP expression within BMECs and pericytes both in the cortex (Fig. 3B) and  
155 cerebellum (Fig. S4B). Next, we assessed cellular tropism in the context of WEEV-eGFP (1000 pfu)  
156 infection. Although mortality was significantly increased in WEEV-eGFP-infected *Ifnar*<sup>-/-</sup> mice compared  
157 with similarly infected WT animals, *Ifnar*<sup>-/-</sup> mice survive WEEV infection up to 5-6 dpi (Fig. S3B), and  
158 viral infection was undetectable in brain tissues of either WT or *Ifnar*<sup>-/-</sup> mice at 1 dpi (Fig. S3E). Thus,  
159 brain tissues were examined at 3 dpi for both genotypes. Similar to our observations with VEEV, WT  
160 mice infected with WEEV exhibited no GFP expression in BMECs or pericytes, with infection detected  
161 only in neurons (Fig. 3C and Fig. S4C). However, *Ifnar*<sup>-/-</sup> mice additionally exhibited GFP expression  
162 within cortical (Fig. 3D) and cerebellar (Fig. S4D) astrocytes.

163 As the observed changes in cellular tropism could be due a higher titer of viremia in *Ifnar*<sup>-/-</sup> versus WT  
164 mice, *Ifnar*<sup>-/-</sup> mice were infected with 10<sup>6</sup> pfu/ml of a non-replicative (NR) replicon derived from VEEV-  
165 eGFP (24); a physiologically relevant dose that is equivalent to the level of viremia observed in WT  
166 mice after f.p. inoculation (Fig. S4F). Following cellular entry, NR-VEEV-eGFP undergoes RNA  
167 replication and produces reporter genes products, but no progeny virus, due to lack of structural genes

168 (24). Similar to our results with WT VEEV-eGFP, WT animals infected with NR-VEEV-eGFP had no  
169 infection of BEMCs or pericytes (Fig. 3E), whereas *Ifnar*<sup>-/-</sup> mice exhibited extensive infection of these  
170 cell types in multiple brain regions, including the cortex (Fig. 3F) and cerebellum (Fig. S4E). These  
171 findings support the notion that alphavirus infection is differentially restricted at the NVU by IFNAR  
172 signaling, which prevents CNS entry by blocking active virus replication within BMECs.

173

174 **Ultrastructural analysis reveals alphavirus interaction and entry at the BBB.** To further  
175 characterize virus-cell interactions at the BBB *in vivo*, we performed transmission electron microscopy  
176 (TEM) of CNS tissues derived from VEEV-infected WT and *Ifnar*<sup>-/-</sup> mice. TEM analysis of *Ifnar*<sup>-/-</sup> mice,  
177 which develop high level viremia (Fig. S4F), revealed 70 nm spherical structures with electron dense  
178 cores, consistent with virions (25), attached to the luminal surface of cortical microvessels (Fig. 4A).  
179 Remarkably, immunogold labeling using antibodies against the VEEV E2 glycoproteins detected viral  
180 particles inside cortical BMECs of WT mice (Fig. 4B). Since WT BMECs do not support VEEV  
181 replication *in vivo* (Fig. 3A), detection of E2 glycoproteins likely represents an intact virion rather than  
182 intracellular protein expression. Based on these observations, we hypothesized that VEEV may cross  
183 the BBB as free particles. To examine this, mice were infected with NR-VEEV-eGFP via *i.v.* injection. At  
184 1 dpi, we detected infection of astrocyte-like cells in multiple brain regions, including cortex and  
185 cerebellum (Fig. 4C and D), suggesting that VEEV can cross the BBB as free virions, likely via a  
186 transcytosis mechanism.

187

188 **Alphavirus crosses brain endothelial cells via caveolae-mediated transcytosis.** Based on our  
189 TEM data (Fig. 4A and B), we hypothesized that alphaviruses may exploit BMEC endocytic machinery

190 for entry across the BBB. Contrary to peripheral tissues, the rate of transcytosis and numbers of  
191 endocytic vesicles are relatively low in BMECs (9). However, exposure of BMECs to VEEV or WEEV  
192 (MOI 10) resulted in enhanced caveolae formation at the cell surface (Fig. 5A-D). We next quantified  
193 the number of caveolae-like structures in BMECs of VEEV-infected mice. Similar to our *in vitro* data, we  
194 observed increased vesiculation in cytoplasm and at the luminal surface of BMECs in infected animals  
195 (Fig. 5E-G). In addition, virus infection induced membrane ruffling in BMECs of infected mice (Fig. 5H).  
196 These observations suggest a possible mechanism for viral transcytosis. To address this, we utilized a  
197 transcytosis assay in which virus is added to the top chambers of transwell inserts for 60 min, followed  
198 by removal of inserts and assessment of infectious virions in the bottom chamber (Fig. 6A). As the  
199 replication time of VEEV in BMECs is approximately 3-6 h (Fig. S5A), virus detected in the bottom  
200 chamber is unlikely due to replication, which was confirmed via assessment of GFP expression in  
201 bottom chamber astrocytes after transcytosis of NR-VEEV-eGFP virus (Fig. 6B). TEM evaluation of  
202 virus transcytosis across BMECs additionally identified virion-like structures within endosomes,  
203 characteristic of caveolae (26). Virion-containing endosomes were detected at various stages of  
204 transcytosis, i.e. early endosomes, multi-vesicular bodies and exocytic vesicles (Fig. 6C-E). Together,  
205 these data suggest that VEEV has the ability to cross endothelial cell barrier via a transcytosis  
206 mechanism.

207 Transcytosis may utilize various pathways, including macropinocytosis, and clathrin- or  
208 caveolae-mediated endocytosis (CME & Cav-ME, respectively) (10, 27), which may be interrogated via  
209 use of inhibitors including amiloride hydrochloride (macropinocytosis); filipin, nystatin and cholesterol  
210 oxidase (Cav-ME), and chlorpromazine (CME). Compared with untreated BMECs or hCMEC/D3, the  
211 percentage of transcytosis for both VEEV and WEEV was significantly reduced in the presence of  
212 inhibitors of Cav-ME, but not CME or macropinocytosis (Fig. 6F-I). Notably, none of the inhibitors

213 affected viral infectivity or barrier integrity (Fig. S5B-E). In accordance with the key role of caveolin-1 in  
214 caveolae formation, *Cav-1<sup>-/-</sup>* BMECs displayed diminished virus transcytosis as compared to WT cells  
215 (Fig. 6J). These results were further verified using freeze fracture electron microscopy, wherein we  
216 identified VEEV particles (8 nm gold particle; orange arrow) co-localized with Cav-1<sup>+</sup> (16 nm gold  
217 particles, white arrow) (Fig. 6K). In addition, lung endothelial cells exhibited significantly reduced virus  
218 transcytosis compared to BMECs (Fig. 6L), suggesting specificity of alphavirus transcytosis for BMECs.

219 Caveolae formation is enhanced by the small Rho GTPase RhoA, which is inhibited by Rac1  
220 activity (28, 29). Consistent with this, H-1152 (Rho-kinase inhibitor) significantly reduced VEEV  
221 transcytosis across BMECs, while Z62954982 (Rac-1 inhibitor) had no significant effect on virus  
222 transmigration (Fig. 6M). However, treatment with IFN- $\alpha$  or IFN- $\beta$ , which has been shown to promote  
223 BBB tight junction integrity via activation of Rac-1 (15), significantly reduced VEEV transcytosis,  
224 suggesting direct effects of IFNAR signaling on Cav-MT (Fig. 6N). Together, these results indicate that  
225 VEEV and WEEV exploit Cav-1-MT to cross an intact BBB and that this may be regulated by IFN.

226

227 **Caveolin-1 contributes to alphavirus neuroinvasion *in vivo*.** To validate the role of caveolin-1 in  
228 early alphavirus neuroinvasion *in vivo*, we infected WT and *Cav-1<sup>-/-</sup>* mice with either VEEV (10 pfu) or  
229 WEEV (1000 pfu) via f.p. infection and examined CNS viral burdens at 1 and 3 dpi. Both VEEV and  
230 WEEV-infected *Cav-1<sup>-/-</sup>* mice exhibited significantly reduced viral titers in the cortex and cerebellum at 1  
231 dpi and 3 dpi, respectively, as compared to similarly infected WT animals, whereas viral burden in the  
232 serum and spleen were indistinguishable between the two genotypes (Fig. 7A and B). Importantly, no  
233 differences in CNS viral loads were detected in intracranial alphavirus-infected WT versus *Cav-1<sup>-/-</sup>* mice  
234 (Fig. S6A and B), indicating no effect of Cav-1-deficiency on viral replication within the CNS. These



235 results indicate that caveolin-1 critically contributes to alphavirus neuroinvasion after peripheral  
236 infection.

## 237 Discussion

238 Using *in vitro* and *in vivo* approaches, we examined early events during alphavirus  
239 neuroinvasion. We found that VEEV and WEEV can enter the CNS via hematogenous dissemination  
240 across an intact BBB, without viral replication within BMECs or pericytes, leading to productive infection  
241 of CNS resident cells. Differential restriction of viral infection within cellular constituents of the NVU is  
242 mediated by IFNAR signaling, with replication in BMECs and pericytes (VEEV), and astrocytes (WEEV)  
243 only observed in *Ifnar*<sup>-/-</sup> mice. VEEV and WEEV entry across the BBB occurs via Cav-MT, which is  
244 impeded by Rho kinase inhibitor and IFN, the latter likely via activation of Rac1 (15, 16). Immuno-EM  
245 demonstrated alphavirus interaction, internalization and Cav-1 association within BMECs both *in vitro*  
246 and *in vivo*. Consistent with this, Cav-1-deficiency reduced alphavirus transcytosis *in vitro* and led to  
247 reduced titers of VEEV or WEEV in the CNS during early infection *in vivo*. Taken together, these data  
248 suggest that innate immune signaling regulates alphavirus neuroinvasion and replication at the NVU.

249 The CNS entry of alphaviruses following peripheral infection has been shown to occur via  
250 multiple routes. Early studies in mice indicated that VEEV may reach the brain via retrograde transport  
251 along peripheral nerves (1), whereas, more recently VEEV and other encephalitic alphaviruses have  
252 been shown to enter the CNS directly from the bloodstream (2, 17, 30). In our study, peripheral  
253 infection of mice with virulent strains of VEEV and WEEV resulted in detectable viral loads at time-  
254 points that precede BBB disruption (Fig. 1), and neither VEEV nor WEEV induced alterations in TEER  
255 across an *in vitro* BBB. These results indicate that alphaviruses cross the BBB shortly after infection  
256 without affecting barrier integrity. Hematogenous routes of neuroinvasion may include viral passage  
257 through the CVOs, which lack specializations that comprise the BBB (2). Our study demonstrated that  
258 shortly after *i.v.* infection (16hrs), foci of alphavirus infection are observed simultaneously in cortical and  
259 cerebellar locations distant from the CVOs, suggesting that CNS entry is not exclusive to these

260 structures. Notably, BBB breakdown occurs at later time-points, when viral loads have peaked, likely  
261 due to induction of inflammatory responses and infiltration of immune cells into the CNS (21, 31, 32).

262 Pathogens, including viruses, may cross the BBB via direct infection of brain endothelium (33,  
263 34). Use of reporter and non-replicative strains of VEEV and WEEV during *in vivo* infection, however,  
264 indicated lack of infection within BMECs (Fig. 3), suggesting that active virus replication in brain  
265 endothelium does not contribute to CNS entry. VEEV has a broad tissue tropism and can infect many  
266 cell types, including macrophages and dendritic cells (24). Infected leukocytes may act as Trojan  
267 horses and introduce viral particles into the CNS upon infiltration. However, leukocyte interaction and  
268 extravasation at the BBB require elevated expression of cell adhesion molecules (CAMs) on brain  
269 endothelium, which does not occur until 3dpi (21). Since we detected significant viral loads throughout  
270 the CNS by 1 dpi (Fig. 1), it is unlikely that infected leukocytes are the initial source of virus in the CNS.  
271 Importantly, our data using NR-VEEV-eGFP did not detect viral infection within CNS infiltrating  
272 leukocytes, suggesting that virus can enter CNS as free virion and independent of leukocyte trafficking.  
273 Nonetheless, additional studies are required to precisely define the role of Trojan horse in alphavirus  
274 neuroinvasion.

275 Our TEM analysis demonstrated virus like particles attached to the lumen of brain endothelium.  
276 Given that viremia arises as early as 8 hr post VEEV infection, BMECs are likely among the first cell  
277 types exposed to virions. Such exposure may trigger innate immune responses (e.g. type I IFNs), which  
278 can influence intercellular communication at the NVU (35). Indeed, in the context of IFNAR deficiency,  
279 VEEV and WEEV replicate within BMECs and astrocytes, respectively. The lack of viral replication  
280 within these cellular constituents of the NVU in WT animals is likely due to paracrine effects of IFN that  
281 induce antiviral proteins, as has been recently reported for arthritogenic alphaviruses (36, 37). VEEV  
282 attachment to and internalization within BMECs was further confirmed via immuno-TEM, in which viral

283 E2 glycoproteins were detected within these cells, supporting the notion that alphaviruses may cross  
284 the BBB via a transcytosis pathway.

285         Compared to peripheral tissues, the rate of transcytosis at the BBB is unusually low. However,  
286 this rate may be augmented by increased Src kinase activity, which is mediated by a group of  
287 pathologic and non-pathologic stimuli, including inflammatory mediators and immune cell interactions  
288 with brain endothelium (38). Viruses may also increase vesicular trafficking, as has been observed in  
289 peripherally-derived endothelial cells exposed to dengue virus (39). In our study we utilized both *in vitro*  
290 assays and *in vivo* viral infection models, and observed that both VEEV and WEEV induce formation of  
291 caveolae in BMECs. *In vivo*, VEEV infected mice exhibited increased vesiculation and membrane  
292 ruffling within brain endothelial cells (Fig. 5). *In vitro* studies have shown that alphaviruses may induce  
293 dramatic structural changes in the actin cytoskeleton, leading to the formation of filopodia-like  
294 extensions in infected cells (40). Notably, expression of the viral non-structural protein (nsP)-1 alone is  
295 sufficient to trigger formation of short extensions, which is dependent on its palmitoylation activity (41).  
296 Consistent with this, ablation of nsP1 palmitoylation sites abolishes the ability of Semliki Forest virus  
297 (SFV) to infect the brain in murine models (42). Elucidating molecular mechanisms underlying  
298 alphavirus induced vesiculation in BMECs may reveal therapeutic targets against viral neuroinvasion,  
299 and provide insights for BBB maintenance in the context of other neurological disorders induced by  
300 increased transcytosis in brain endothelium (43–45).

301         Transcytosis of macromolecules across brain endothelium predominantly occurs via  
302 mechanisms that utilize caveolae. During infectious diseases, interaction with caveolae allows  
303 pathogens to escape lysosomal degradation and cross endothelial cell barriers (46, 47). While different  
304 families of viruses have been shown to cross epithelial and endothelial cell barriers utilizing Cav-MT *in*  
305 *vitro* (48–50), *in vivo* findings to support these data have been difficult to obtain, especially within the

306 brain where these events are rare. Our study utilized multiple approaches to demonstrate that  
307 neurotropic alphaviruses enter but do not replicate within brain endothelium, and that Cav-MT  
308 contributes to *in vivo* viral infection of the CNS. As peripherally infected *Cav-1<sup>-/-</sup>* mice exhibit a delay in  
309 achievement of peak brain titers of VEEV and WEEV compared to WT animals, entry of virus in the  
310 absence of caveolae may rely on slower mechanisms of viral entry, such as retrograde transport along  
311 axons (1). Additionally, ablation of caveolin-1 results in upregulation of caveolin-independent pathways  
312 (51), which might explain how viral loads within CNS tissues derived from *Cav-1<sup>-/-</sup>* mice quickly attain  
313 the levels observed in WT animals.

314 The signaling cascade underlying transcytosis was further elaborated using *in vitro* assays,  
315 wherein deficiency in caveolin-1 or depletion of membrane cholesterol significantly reduced VEEV and  
316 WEEV transcytosis across BMEC monolayer. Notably, virus transcytosis across brain endothelial cells  
317 was blocked by Rho kinase inhibitor (Fig. 6). The Rho family of GTPases, including RhoA, Rac-1 and  
318 Cdc42 are known to play a role in pathogen uptake and dissemination within the host (52–55). These  
319 proteins alternate between an active GTP-bound, and an inactive GDP-bound form, which triggers  
320 rearrangements in the actin cytoskeleton and cellular uptake of pathogens (56). Studies in flavivirus  
321 encephalitis have shown that IFN $\beta$  acts in synergy with the TAM receptor Mertk to activate of Rac-1,  
322 which enhances BBB tight junction integrity, thereby preventing paracellular entry of virus (15, 16). In  
323 the current study, we discovered that type I IFN also prevents alphavirus transcytosis across BMECs.  
324 Thus, although the VEEV nsP2 and capsid protein inhibits IFN signaling via host-shut off (4), the lack of  
325 viral replication within BMECs may allow IFN signaling to limit viral entry likely via modulation of Rho  
326 GTPases (15).

327 In summary, mechanisms of encephalitic alphavirus neuroinvasion from the blood are complex  
328 and may depend on individual viral tropism for olfactory sensory neurons and cellular constituents of

329 the NVU, which provide avenues of entry that cross the BBB, respectively (24, 57). Neuroinvasion may  
330 also depend on innate immune mechanisms that exert virus and cell-specific effects on replication (4).  
331 Ablation of the olfactory route reduces but does not eliminate CNS entry of VEEV (1), suggesting each  
332 route of entry provides a relative contribution to alphavirus neuroinvasion. Further studies are needed  
333 to address how each process individually contributes to viral entry, and whether viral spread within the  
334 CNS relies on these pathways or on innate immune mechanisms that regulate intracellular viral  
335 trafficking and replication within permissive cells. Our data highlighted the critical role of Cav-MT in  
336 alphavirus neuroinvasion. Delineating molecular mechanisms involved in this process may reveal novel  
337 targets for potential therapeutic interventions against CNS infection.

338

339 **MATERIALS AND METHODS**

340 **Cells.** Baby hamster kidney (BHK-21) and African green monkey kidney (Vero) cells were maintained  
341 in Dulbecco's Modified Eagle's medium (DMEM) supplemented with 10% fetal bovine serum (FBS) and  
342 100 µg/ml of penicillin and streptomycin. Primary murine brain microvascular endothelial cells  
343 (BMECs), pericytes and astrocytes were isolated from cortical brain of C57BL/6J mice, and maintained  
344 in culture as described previously (15, 58). The immortalized human cerebral microvascular endothelial  
345 cell line hCMEC/D3 (59) was purchased from Millipore Sigma and maintained in Endothelial Cell  
346 Growth Basal Medium-2 (EBM2, Lonza). Primary human astrocytes and murine lung endothelial cells  
347 were purchased from ScienCell Research Laboratories and Cell Biologics, respectively. Cells were  
348 maintained in the culture medium recommended by each company.

349

350 **Antibodies and reagents.** Rabbit polyclonal anti-S100-β (ab41548), rabbit monoclonal anti-Calbindin  
351 (ab108404) and rabbit polyclonal anti-RFP (ab62341) antibodies (Abs) were purchased from Abcam  
352 Biotechnology. Purified rat anti-mouse CD31 (550274, clone MEC 13.3) and guinea pig anti-NeuN  
353 (ABN90P) polyclonal Abs were purchased from BD Biosciences and Millipore-Sigma, respectively.  
354 Goat anti-PDGFR-β (AF1042) Ab was purchased from R&D Systems. The anti-VEEV E2 monoclonal  
355 antibody was a kind gift from Dr. Michael Diamond (Washington University in St Louis). Amiloride  
356 hydrochloride hydrate, filipin, cholesterol oxidase, nystatin, chlorpromazine hydrochloride, Z62954982  
357 and fluorescein sodium salt were purchased from Sigma-Aldrich. (S)-Glycyl-H-1152 (hydrochloride)  
358 was purchased from Cayman company. Mouse IFN-α and -β were obtained from PBL Assay Science.

359

360 **Virus propagation, purification, and titration.** All viruses used in this study including the non-  
361 replicative “replicon” strain of VEEV (NR-VEEV-eGFP), replication competent VEEV, McMillan (WEEV),  
362 and GFP reporter viruses (60) were generously provided by Dr. William Klimstra (University of  
363 Pittsburgh, Pittsburgh, PA). The parental VEEV and WEEV cDNAs were gifts to Dr. Klimstra from Dr.  
364 Scott Weaver, University of Texas Medical Branch at Galveston and Dr. Kenneth Olson, Colorado State  
365 University, respectively. The McMillan cDNA was modified by placing the entire virus coding region in a  
366 pBR322-based plasmid under control of a T7 bacteriophage promoter. Stocks of VEEV and WEEV  
367 viruses were generated as described previously (61). Briefly, BHK-21 cells were infected at a  
368 multiplicity of infection (MOI) of 0.1. Culture medium was replaced with fresh medium 4 hr later. Virus-  
369 containing supernatants were collected on the next day (~30 h post infection), cleared from cell debris  
370 by low-speed centrifugation and filtered through 0.22  $\mu$ m filters. Virus particles were then concentrated  
371 by ultracentrifugation at 100,000 g for 2 h at 4°C through a cushion of 30% (wt/wt) sucrose in PBS. The  
372 virus pellet was re-suspended in PBS and stored in single use aliquots at -80°C. Titration of VEEV and  
373 WEEV were performed in BHK-21 and Vero cells, respectively.

374

375 **Multi-step growth curves.** Primary murine BMECs, astrocytes and pericytes were seeded in 24-well  
376 plates for 3-4 days till they reached confluence. At this point cells were exposed to MOIs of 0.01, 0.1,  
377 and 1 of VEEV and WEEV viruses. Culture medium was removed one hour post infection and cells  
378 were washed 4 times with 1 ml/well of PBS. The last wash was stored at -80°C, and later it was used in  
379 plaque assay to determine residual unbound virus remaining in each well. Culture supernatant was  
380 harvested at specified time points and virus titer was determined using plaque assay in BHK-21 (VEEV)  
381 and Vero cells (WEEV).

382



383 **Mice studies.** C57BL/6J wild-type and caveoline-1 knockout mice were purchased from Jackson  
384 Laboratory (Bar Harbor, ME). *Ifnar*<sup>-/-</sup> mice were kindly provided by Dr. Michael Diamond (Washington  
385 University School of Medicine, St. Louis, MO). Animals were housed under pathogen-free conditions,  
386 and the experimental procedures were completed in accordance with the Washington University School  
387 of Medicine Animal Safety Committee. Male, 8- to 9-week-old mice were used in all *in vivo*  
388 experiments. Mice infections were performed by administering virus either subcutaneous (SC),  
389 intravenous (IV) or intracranial (IC) injection, while the mice were under light ketamine anesthesia. For  
390 subcutaneous infection, mice were injected in the footpad with VEEV (10 pfu) and WEEV (1000 pfu) in  
391 50 µl PBS. Intracranial infections were performed by inoculating 10 pfu (VEEV) or 100 pfu (WEEV) of  
392 virus in 10 µl of PBS into the right cerebral hemisphere via a guided 29-gauge needle. Intravenous  
393 infections were achieved by administering 2\*10<sup>6</sup> pfu of virus in 100 µl of PBS via retro-orbital injection.  
394 Mock infected animals received the same volume of PBS in each infection method and were  
395 considered as controls where needed.

396

397 **Measurement of viral burden in tissues.** To monitor the kinetic of virus spread *in vivo*, peripheral  
398 organs and CNS tissues were harvested from infected mice at specified time points. Prior to this, mice  
399 were perfused transcardially with 30 ml PBS. Tissues were homogenized in 500 µl PBS using MagNA  
400 Lyser (6000 rpm for 1 min) instrument, and virus titer in tissues homogenates was determined using  
401 plaque assay in either BHK-21 or Vero cells depending on virus. Alternatively, groups of mice were  
402 followed for survival assays.

403

404 ***In vivo* assessment of BBB permeability.** At given days post infection, mice received 100  $\mu$ l of 100  
405 mg/ml fluorescein sodium salt (NaFL) in PBS via intraperitoneal injection. When the salt has reached  
406 equilibrium (45 min), blood samples were collected, and mice were perfused transcardially with 30 ml  
407 PBS prior to collection of CNS tissues. Serum samples and tissue homogenates were treated with 2%  
408 trichloroacetic acid overnight at 4°C to precipitate proteins. Supernatants were clarified from cellular  
409 debris by centrifugation (4000 rpm for 20 min at 4°C) and diluted in equal volumes of borate buffer, pH  
410 11 (Sigma- Aldrich). Concentration of NaFL in supernatants was determined by measuring fluorescence  
411 emission at 538 nm using Synergy H1 microplate reader (BioTek Instruments, Inc.). Measurement  
412 values were normalized to tissue weight and to NaFL plasma concentration in each mouse.

413

414 ***In vitro* BBB model and transcytosis assay.** An *in vitro* BBB model was generated as described  
415 elsewhere (61). Briefly, BMECs were seeded on the apical side of fibronectin-coated inserts (BD  
416 Falcon, 24-well, 3  $\mu$ m pores). Concurrently, primary murine astrocytes were cultured in fibronectin-  
417 coated 24-well plates. Two days later, when astrocytes reached confluent, BMECs inserts were moved  
418 to astrocytes-containing plate. Astrocytes release growth factors that promote barrier formation  
419 between BMECs. Culture medium was changed every 3 days. On day 7, hydrocortisone (550 nM),  
420 CTP-cAMP (250  $\mu$ M) and RO 20-1724 (17.5  $\mu$ M) compounds were added to the cells in serum free  
421 medium to further promote expression of tight junctions and barrier formation between BMECs. On the  
422 following day, barrier integrity was assessed by measuring transendothelial electric resistance (TEER)  
423 before cells were used for transcytosis assay. In these assays, BMECs on the top chamber are  
424 exposed to different treatments for 1-2 h. Virus particles are then added at a MOI of 2 to BMECs on the  
425 top chamber for an additional hour. At this point, BMEC inserts are removed and culture medium is  
426 collected from the bottom chamber and is used in plaque assay to determine the number of virus

427 particles that have crossed the BMECs monolayer in the presence and absence of different inhibitors.  
428 Exposure of BMECs to alphavirus is limited to one hour to prevent active virus replication and release  
429 of viral progenies from the basolateral side.

430

431 **Immunohistochemistry and confocal microscopy.** Brain tissues were collected from infected mice  
432 at specified time points as indicated in each figure legend. Prior to tissue collection, mice were deeply  
433 anesthetized and perfused transcardially with 30 ml of PBS followed by 30 ml of 4% paraformaldehyde  
434 (PFA). Tissues were stored overnight in 4% PFA in PBS at 4°C, then transferred into two exchanges  
435 of 30% sucrose for 48 h, before they were embedded in O.C.T compound (Tissue-Tek). 10 µm cryostat  
436 brain sections were treated with proteinase K (5 µg/ml for 30 min at RT) for antigen retrieval. After 30  
437 min incubation in blocking buffer, tissues sections were stained with primary antibodies to markers for  
438 astrocytes (S100 calcium-binding protein (S100)-β), pericytes (platelet-derived growth factor receptor  
439 beta/PDGFR-β), BMECs (CD31) and neurons (NeuN and calbindin). Sections were then incubated with  
440 appropriate secondary antibodies (Alexa Fluor 488, 555, and Dylight 650, all from Invitrogen) for 15 min  
441 in blocking buffer, followed by three washes in PBS. After antibody labelling, cells were counterstained  
442 with DAPI (D1306, Invitrogen). All images were obtained using confocal microscope (Carl Zeiss), and  
443 processed with ImageJ software (NIH).

444

445 **Transmission- and immunogold electron microscopy.** For TEM, mice underwent cardiac perfusion  
446 with 5 ml of PBS, followed by 20 ml of 1.5% glutaraldehyde and 1% PFA in 0.12 M sodium  
447 pyrophosphate buffer, while for immuno-EM studies, perfusion was performed with 5 ml of PBS and 20  
448 ml of 4% paraformaldehyde in 0.12 M sodium pyrophosphate buffer. Brain tissues were then collected

449 and stored in fixative buffer overnight at 4°C and processed as previously described(61). For immuno-  
450 EM, ultrathin brain sections (70 nm) were stained with primary and gold-conjugated secondary  
451 antibodies on carbon-coated glass. Sections were viewed on a JEM-1400 transmission microscope  
452 (JEOL) at 80 KV with an AMT XR111 4k digital camera. For *in vitro* assays, monolayer of BMECs on  
453 Transwell inserts was infected with alphavirus at a MOI of 200. After 30 min, culture medium was  
454 replaced with fixative buffer (2% PFA and 2.5% glutaraldehyde in 100 mM sodium cacodylate buffer,  
455 pH 7.2) and incubated for 1 h at room temperature. Cells were then rinsed with sodium cacodylate  
456 buffer, and embedded in a thin layer of 2.5% agarose, followed by 1 h of fixation in 1% osmium  
457 tetroxide (Polysciences Inc.). After extensive wash with dH<sub>2</sub>O, cells were stained with 1% aqueous  
458 uranyl acetate (Ted Pella Inc., Redding, CA) for 1 h, dehydrated through a series of ethanol  
459 concentrations in distilled water, and embedded in Eponate 12 resin (Ted Pella Inc.). Ultrathin sections  
460 were generated at 95 nm using UCT ultramicrotome (Leica Microsystems Inc., Bannockburn, IL), and  
461 stained with uranyl acetate and lead citrate. Electron micrographs were obtained using a transmission  
462 electron microscope JEOL 1200 EX (JEOL USA Inc., Peabody, MA) equipped with an AMT 8-  
463 megapixel digital camera and AMT Image Capture Engine V602 software (Advanced Microscopy  
464 Techniques, Woburn, MA).

465

466 **Freeze fracture deep etching electron microscopy.** Freeze fracture electron microscopy was  
467 achieved as described perviously(62). Briefly, cultured BMECs were rapidly frozen by abrupt  
468 application of the sample against a liquid helium-cooled copper block with a Cryopress freezing  
469 machine. Samples were then moved to a liquid nitrogen-cooled Balzers 400 vacuum evaporator,  
470 fractured, and etched at -104°C for 2.5 min. For immuno-freeze fracture EM, etched samples were first  
471 stained with primary and gold-conjugated secondary antibodies on carbon-coated glass. These

472 samples were then rotary replicated with platinum (~2 nm), deposited from a 20° angle above the  
473 horizontal plane, followed by an immediate, stabilization film of pure carbon (~10 nm) deposited from  
474 an 85° angle. Replicas were floated onto bleach and transferred through multiple rinses of dH<sub>2</sub>O before  
475 placing on formvar-coated EM grids. Electron micrographs were obtained using a JEM1400  
476 transmission microscope (JEOL) at 80 KV, equipped with an AMT XR111 4k digital camera.

477

478 **Statistical analysis.** Statistical analysis was performed using GraphPad Prism 7 software. A  
479 probability value of  $p < 0.05$  was considered statistically significant. Statistical values are indicated as \*,  
480  $P < 0.05$ ; \*\*,  $P < 0.01$ ; \*\*\*,  $P < 0.001$ .

#### 481 **Acknowledgements**

482 This work was supported by Defense Threat Reduction Agency (DTRA) grants HDTRA1-15-1-0032  
483 (R.B.K.) and HDTRA1-15-1-0047 (W.B.K.) and NIH grants U19 AI083019, R01 NS052632, and R01  
484 AI101400, (R.S.K.). We have no conflicting interests to declare.

485 Correspondence and requests for materials should be addressed to R.S.K.

486 **References**

- 487 1. Charles PC, Walters E, Margolis F, Johnston RE. 1995. Mechanism of neuroinvasion of  
488 Venezuelan equine encephalitis virus in the mouse. *Virology* 208:662–671.
- 489 2. Phillips AT, Rico AB, Stauff CB, Hammond SL, Aboellail TA, Tjalkens RB, Olson KE. 2016. Entry  
490 Sites of Venezuelan and Western Equine Encephalitis Viruses in the Mouse Central Nervous  
491 System following Peripheral Infection. *J Virol* 90:5785–5796.
- 492 3. Fros JJ, Pijlman GP. 2016. Alphavirus Infection: Host Cell Shut-Off and Inhibition of Antiviral  
493 Responses. *Viruses* 8.
- 494 4. Bhalla N, Sun C, Metthew Lam LK, Gardner CL, Ryman KD, Klimstra WB. 2016. Host translation  
495 shutoff mediated by non-structural protein 2 is a critical factor in the antiviral state resistance of  
496 Venezuelan equine encephalitis virus. *Virology* 496:147–165.
- 497 5. Liebner S, Dijkhuizen RM, Reiss Y, Plate KH, Agalliu D, Constantin G. 2018. Functional  
498 morphology of the blood-brain barrier in health and disease. *Acta Neuropathol (Berl)* 135:311–  
499 336.
- 500 6. Dando SJ, Mackay-Sim A, Norton R, Currie BJ, John JAS, Ekberg JAK, Batzloff M, Ulett GC,  
501 Beacham IR. 2014. Pathogens Penetrating the Central Nervous System: Infection Pathways and  
502 the Cellular and Molecular Mechanisms of Invasion. *Clin Microbiol Rev* 27:691–726.
- 503 7. Lachenmaier SM, Deli MA, Meissner M, Liesenfeld O. 2011. Intracellular transport of *Toxoplasma*  
504 *gondii* through the blood-brain barrier. *J Neuroimmunol* 232:119–130.

- 505 8. Zhao Y-L, Song J-N, Zhang M. 2014. Role of caveolin-1 in the biology of the blood-brain barrier.  
506 Rev Neurosci 25:247–254.
- 507 9. Andreone BJ, Chow BW, Tata A, Lacoste B, Ben-Zvi A, Bullock K, Deik AA, Ginty DD, Clish CB,  
508 Gu C. 2017. Blood-Brain Barrier Permeability Is Regulated by Lipid Transport-Dependent  
509 Suppression of Caveolae-Mediated Transcytosis. Neuron 94:581-594.e5.
- 510 10. Preston JE, Joan Abbott N, Begley DJ. 2014. Transcytosis of macromolecules at the blood-brain  
511 barrier. Adv Pharmacol San Diego Calif 71:147–163.
- 512 11. Coyne CB, Bozym R, Morosky SA, Hanna SL, Mukherjee A, Tudor M, Kim KS, Cherry S. 2011.  
513 Comparative RNAi Screening Reveals Host Factors Involved in Enterovirus Infection of Polarized  
514 Endothelial Monolayers. Cell Host Microbe 9:70–82.
- 515 12. Van den Broeke C, Jacob T, Favoreel HW. 2014. Rho'ing in and out of cells. Small GTPases 5.
- 516 13. Persidsky Y, Heilman D, Haorah J, Zelivyanskaya M, Persidsky R, Weber GA, Shimokawa H,  
517 Kaibuchi K, Ikezu T. 2006. Rho-mediated regulation of tight junctions during monocyte migration  
518 across the blood-brain barrier in HIV-1 encephalitis (HIVE). Blood 107:4770–4780.
- 519 14. Afonso PV, Ozden S, Cumont M-C, Seilhean D, Cartier L, Rezaie P, Mason S, Lambert S, Huerre  
520 M, Gessain A, Couraud P-O, Pique C, Ceccaldi P-E, Romero IA. 2008. Alteration of Blood–Brain  
521 Barrier Integrity by Retroviral Infection. PLOS Pathog 4:e1000205.
- 522 15. Daniels BP, Holman DW, Cruz-Orengo L, Jujjavarapu H, Durrant DM, Klein RS. 2014. Viral  
523 pathogen-associated molecular patterns regulate blood-brain barrier integrity via competing innate  
524 cytokine signals. mBio 5:e01476-01414.

- 525 16. Miner JJ, Daniels BP, Shrestha B, Proenca-Modena JL, Lew ED, Lazear HM, Gorman MJ, Lemke  
526 G, Klein RS, Diamond MS. 2015. The TAM receptor Mertk protects against neuroinvasive viral  
527 infection by maintaining blood-brain barrier integrity. *Nat Med* 21:1464–1472.
- 528 17. Vogel P, Kell WM, Fritz DL, Parker MD, Schoepp RJ. 2005. Early events in the pathogenesis of  
529 eastern equine encephalitis virus in mice. *Am J Pathol* 166:159–171.
- 530 18. Phillips AT, Rico AB, Stauff CB, Hammond SL, Aboellail TA, Tjalkens RB, Olson KE. 2016. Entry  
531 Sites of Venezuelan and Western Equine Encephalitis Viruses in the Mouse Central Nervous  
532 System following Peripheral Infection. *J Virol* 90:5785–5796.
- 533 19. Ronca SE, Dineley KT, Paessler S. 2016. Neurological Sequelae Resulting from Encephalitic  
534 Alphavirus Infection. *Front Microbiol* 7.
- 535 20. Zacks MA, Paessler S. 2010. Encephalitic alphaviruses. *Vet Microbiol* 140:281–286.
- 536 21. Schäfer A, Brooke CB, Whitmore AC, Johnston RE. 2011. The Role of the Blood-Brain Barrier  
537 during Venezuelan Equine Encephalitis Virus Infection. *J Virol* 85:10682–10690.
- 538 22. Wang E, Barrera R, Boshell J, Ferro C, Freier JE, Navarro JC, Salas R, Vasquez C, Weaver SC.  
539 1999. Genetic and phenotypic changes accompanying the emergence of epizootic subtype IC  
540 Venezuelan equine encephalitis viruses from an enzootic subtype ID progenitor. *J Virol* 73:4266–  
541 4271.
- 542 23. Mossel EC, Ledermann JP, Phillips AT, Borland EM, Powers AM, Olson KE. 2013. Molecular  
543 Determinants of Mouse Neurovirulence and Mosquito Infection for Western Equine Encephalitis  
544 Virus. *PLOS ONE* 8:e60427.



- 545 24. Gardner CL, Burke CW, Tesfay MZ, Glass PJ, Klimstra WB, Ryman KD. 2008. Eastern and  
546 Venezuelan equine encephalitis viruses differ in their ability to infect dendritic cells and  
547 macrophages: impact of altered cell tropism on pathogenesis. *J Virol* 82:10634–10646.
- 548 25. Zhang R, Hryc CF, Cong Y, Liu X, Jakana J, Gorchakov R, Baker ML, Weaver SC, Chiu W. 2011.  
549 4.4 Å cryo-EM structure of an enveloped alphavirus Venezuelan equine encephalitis virus. *EMBO*  
550 *J* 30:3854–3863.
- 551 26. Kovtun O, Tillu VA, Ariotti N, Parton RG, Collins BM. 2015. Cavin family proteins and the  
552 assembly of caveolae. *J Cell Sci* 128:1269–1278.
- 553 27. Predescu SA, Predescu DN, Malik AB. 2007. Molecular determinants of endothelial transcytosis  
554 and their role in endothelial permeability. *Am J Physiol Lung Cell Mol Physiol* 293:L823-842.
- 555 28. Echarri A, Pozo MAD. 2015. Caveolae – mechanosensitive membrane invaginations linked to  
556 actin filaments. *J Cell Sci* 128:2747–2758.
- 557 29. Komarova YA, Kruse K, Mehta D, Malik AB. 2017. Protein Interactions at Endothelial Junctions  
558 and Signaling Mechanisms Regulating Endothelial Permeability. *Circ Res* 120:179–206.
- 559 30. Honnold SP, Mossel EC, Bakken RR, Lind CM, Cohen JW, Eccleston LT, Spurgers KB, Erwin-  
560 Cohen R, Glass PJ, Maheshwari RK. 2015. Eastern equine encephalitis virus in mice II:  
561 pathogenesis is dependent on route of exposure. *Virol J* 12:154.
- 562 31. Cain MD, Salimi H, Gong Y, Yang L, Hamilton SL, Heffernan JR, Hou J, Miller MJ, Klein RS. 2017.  
563 Virus entry and replication in the brain precedes blood-brain barrier disruption during intranasal  
564 alphavirus infection. *J Neuroimmunol* 308:118–130.

- 565 32. Sharma A, Bhomia M, Honnold SP, Maheshwari RK. 2011. Role of adhesion molecules and  
566 inflammation in Venezuelan equine encephalitis virus infected mouse brain. *Virology* 8:197.
- 567 33. Erbar S, Maisner A. 2010. Nipah virus infection and glycoprotein targeting in endothelial cells.  
568 *Virology* 7:305.
- 569 34. Soilu-Hänninen M, Erälinna JP, Hukkanen V, Røyttä M, Salmi AA, Salonen R. 1994. Semliki  
570 Forest virus infects mouse brain endothelial cells and causes blood-brain barrier damage. *J Virol*  
571 68:6291–6298.
- 572 35. Chhatbar C, Detje CN, Grabski E, Borst K, Spanier J, Ghita L, Elliott DA, Jordão MJC, Mueller N,  
573 Sutton J, Prajeeth CK, Gudi V, Klein MA, Prinz M, Bradke F, Stangel M, Kalinke U. 2018. Type I  
574 Interferon Receptor Signaling of Neurons and Astrocytes Regulates Microglia Activation during  
575 Viral Encephalitis. *Cell Rep* 25:118-129.e4.
- 576 36. Nair S, Poddar S, Shimak RM, Diamond MS. 2017. Interferon Regulatory Factor 1 Protects  
577 against Chikungunya Virus-Induced Immunopathology by Restricting Infection in Muscle Cells. *J*  
578 *Virology* 91:e01419-17.
- 579 37. Gardner CL, Yin J, Burke CW, Klimstra WB, Ryman KD. 2009. Type I interferon induction is  
580 correlated with attenuation of a South American eastern equine encephalitis virus strain in mice.  
581 *Virology* 390:338–347.
- 582 38. Chanthick C, Suttitheptumrong A, Rawarak N, Pattanakitsakul S. 2018. Transcytosis Involvement  
583 in Transport System and Endothelial Permeability of Vascular Leakage during Dengue Virus  
584 Infection. *Viruses* 10:69.

- 585 39. Chanthick C, Kanlaya R, Kiatbumrung R, Pattanakitsakul S, Thongboonkerd V. 2016. Caveolae-  
586 mediated albumin transcytosis is enhanced in dengue-infected human endothelial cells: A model  
587 of vascular leakage in dengue hemorrhagic fever. *Sci Rep* 6:31855.
- 588 40. Brown RS, Wan JJ, Kielian M. 2018. The Alphavirus Exit Pathway: What We Know and What We  
589 Wish We Knew. *Viruses* 10.
- 590 41. Laakkonen P, Auvinen P, Kujala P, Kääriäinen L. 1998. Alphavirus replicase protein NSP1  
591 induces filopodia and rearrangement of actin filaments. *J Virol* 72:10265–10269.
- 592 42. Ahola T, Kujala P, Tuittila M, Blom T, Laakkonen P, Hinkkanen A, Auvinen P. 2000. Effects of  
593 Palmitoylation of Replicase Protein nsP1 on Alphavirus Infection. *J Virol* 74:6725–6733.
- 594 43. Knowland D, Arac A, Sekiguchi KJ, Hsu M, Lutz SE, Perrino J, Steinberg GK, Barres BA,  
595 Nimmerjahn A, Agalliu D. 2014. Stepwise recruitment of transcellular and paracellular pathways  
596 underlies blood-brain barrier breakdown in stroke. *Neuron* 82:603–617.
- 597 44. Castejón OJ. 1980. Electron microscopic study of capillary wall in human cerebral edema. *J*  
598 *Neuropathol Exp Neurol* 39:296–328.
- 599 45. Claudio L, Raine CS, Brosnan CF. 1995. Evidence of persistent blood-brain barrier abnormalities  
600 in chronic-progressive multiple sclerosis. *Acta Neuropathol (Berl)* 90:228–238.
- 601 46. Long M, Huang S-H, Wu C-H, Shackelford GM, Jong A. 2012. Lipid raft/caveolae signaling is  
602 required for *Cryptococcus neoformans* invasion into human brain microvascular endothelial cells.  
603 *J Biomed Sci* 19:19.

- 604 47. Kiss AL, Botos E. 2009. Endocytosis via caveolae: alternative pathway with distinct cellular  
605 compartments to avoid lysosomal degradation? *J Cell Mol Med* 13:1228–1237.
- 606 48. Tugizov SM, Herrera R, Palefsky JM. 2013. Epstein-Barr Virus Transcytosis through Polarized  
607 Oral Epithelial Cells. *J Virol* 87:8179–8194.
- 608 49. Kinlock BL, Wang Y, Turner TM, Wang C, Liu B. 2014. Transcytosis of HIV-1 through vaginal  
609 epithelial cells is dependent on trafficking to the endocytic recycling pathway. *PloS One* 9:e96760.
- 610 50. Papa MP, Meuren LM, Coelho SVA, Lucas CG de O, Mustafá YM, Lemos Matassoli F, Silveira  
611 PP, Frost PS, Pezzuto P, Ribeiro MR, Tanuri A, Nogueira ML, Campanati L, Bozza MT, Paula  
612 Neto HA, Pimentel-Coelho PM, Figueiredo CP, de Aguiar RS, de Arruda LB. 2017. Zika Virus  
613 Infects, Activates, and Crosses Brain Microvascular Endothelial Cells, without Barrier Disruption.  
614 *Front Microbiol* 8:2557.
- 615 51. Chaudhary N, Gomez GA, Howes MT, Lo HP, McMahon K-A, Rae JA, Schieber NL, Hill MM,  
616 Gaus K, Yap AS, Parton RG. 2014. Endocytic crosstalk: cavins, caveolins, and caveolae regulate  
617 clathrin-independent endocytosis. *PLoS Biol* 12:e1001832.
- 618 52. Favoreel HW, Enquist LW, Feierbach B. 2007. Actin and Rho GTPases in herpesvirus biology.  
619 *Trends Microbiol* 15:426–433.
- 620 53. Locker JK, Kuehn A, Schleich S, Rutter G, Hohenberg H, Wepf R, Griffiths G. 2000. Entry of the  
621 Two Infectious Forms of Vaccinia Virus at the Plasma Membrane Is Signaling-Dependent for the  
622 IMV but Not the EEV. *Mol Biol Cell* 11:2497–2511.

- 623 54. Schowalter RM, Wurth MA, Aguilar HC, Lee B, Moncman CL, McCann RO, Dutch RE. 2006. Rho  
624 GTPase activity modulates paramyxovirus fusion protein-mediated cell–cell fusion. *Virology*  
625 350:323–334.
- 626 55. Drewry LL, Jones NG, Wang Q, Onken MD, Miller MJ, Sibley LD. 2019. The secreted kinase  
627 ROP17 promotes *Toxoplasma gondii* dissemination by hijacking monocyte tissue migration. *Nat*  
628 *Microbiol.*
- 629 56. Agarwal V, Hammerschmidt S. 2009. Cdc42 and the Phosphatidylinositol 3-Kinase-Akt Pathway  
630 Are Essential for PspC-mediated Internalization of Pneumococci by Respiratory Epithelial Cells. *J*  
631 *Biol Chem* 284:19427–19436.
- 632 57. Blakely PK, Delekta PC, Miller DJ, Irani DN. 2015. Manipulation of host factors optimizes the  
633 pathogenesis of western equine encephalitis virus infections in mice for antiviral drug  
634 development. *J Neurovirol* 21:43–55.
- 635 58. Boroujerdi A, Tigges U, Welser-Alves JV, Milner R. 2014. Isolation and culture of primary pericytes  
636 from mouse brain. *Methods Mol Biol Clifton NJ* 1135:383–392.
- 637 59. Weksler BB, Subileau EA, Perrière N, Charneau P, Holloway K, Leveque M, Tricoire-Leignel H,  
638 Nicoira A, Bourdoulous S, Turowski P, Male DK, Roux F, Greenwood J, Romero IA, Couraud PO.  
639 2005. Blood-brain barrier-specific properties of a human adult brain endothelial cell line. *FASEB J*  
640 *Off Publ Fed Am Soc Exp Biol* 19:1872–1874.

- 641 60. Sun C, Gardner CL, Watson AM, Ryman KD, Klimstra WB. 2014. Stable, high-level expression of  
642 reporter proteins from improved alphavirus expression vectors to track replication and  
643 dissemination during encephalitic and arthritogenic disease. *J Virol* 88:2035–2046.
- 644 61. Cain MD, Salimi H, Gong Y, Yang L, Hamilton SL, Heffernan JR, Hou J, Miller MJ, Klein RS. 2017.  
645 Virus entry and replication in the brain precedes blood-brain barrier disruption during intranasal  
646 alphavirus infection. *J Neuroimmunol* 308:118–130.
- 647 62. Heuser JE, Kirschner MW. 1980. Filament organization revealed in platinum replicas of freeze-  
648 dried cytoskeletons. *J Cell Biol* 86:212–234.
- 649

FIG. 1

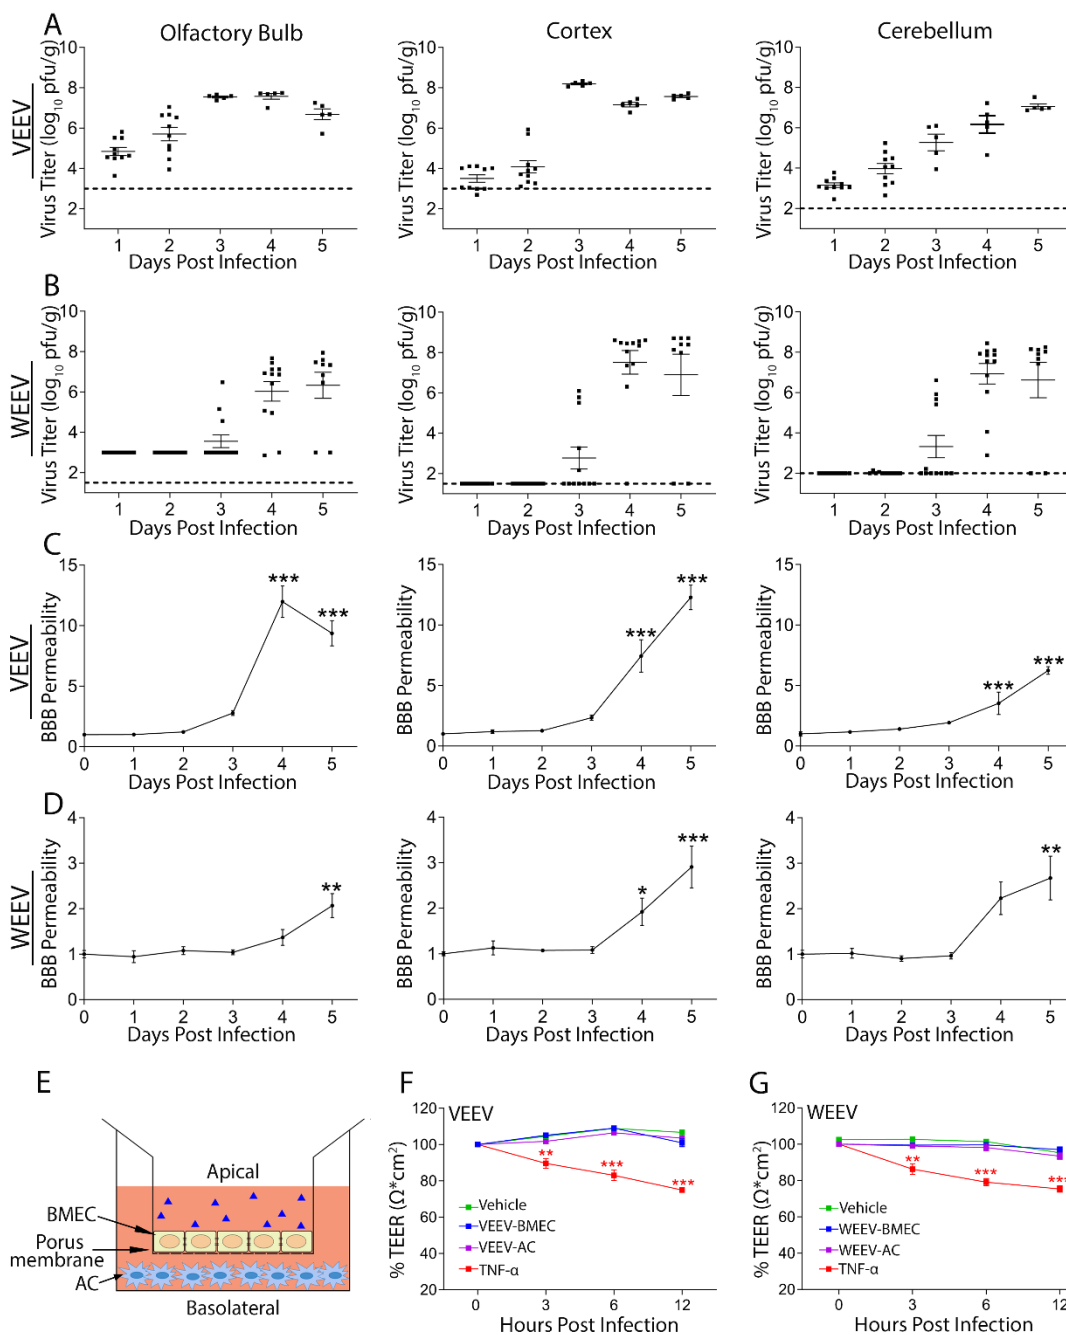

650

651 **FIG 1** Alphavirus infection of the CNS occurs prior to BBB disruption. (A and B) Viral burdens in brain  
 652 tissues of C57BL/6 mice following f.p. infection with either VEEV (10 pfu) or WEEV (1000 pfu),

653 determined by plaque assay. Dashed lines indicate the limit of detection of the assay. Viral burdens  
654 were measured at 1 dpi (VEEV) and 3 dpi (WEE). (C and D) BBB permeability was determined at  
655 indicated dpi by measuring sodium fluorescein in CNS tissues following i.p. administration. Data  
656 presented as mean viral titer or fluorescence  $\pm$  SEM for N=5-10 mice/group. \*,  $P < 0.05$ , \*\*,  $P < 0.01$ ;  
657 \*\*\*,  $P < 0.001$ , via 1-way ANOVA. (E) A schematic figure of an *in vitro* BBB model. (F and G) Neither  
658 exposure of BMECs nor astrocytes (ACs) to VEEV and WEEV viruses had any effects on barrier  
659 integrity. Addition of TNF- $\alpha$  (100 ng/ml) significantly reduced TEER over time. Experiment was  
660 performed twice, each with 6 replicates. Error bars indicate mean  $\pm$  SEM. Statistically significant  
661 differences were determined via 2-way ANOVA followed by Dunnett's multiple comparison test.

662

663

664

665



FIG 2.

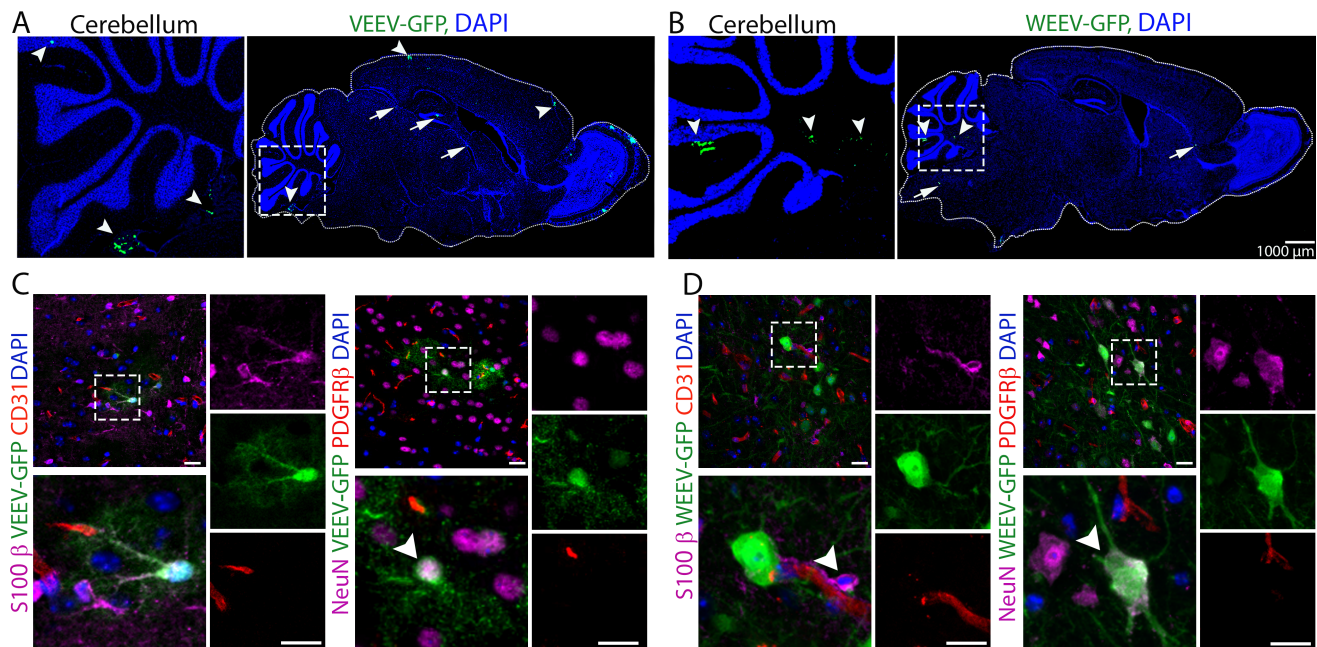

666

667 **FIG 2** Hematogenous route of alphavirus neuroinvasion is not exclusive to CVOs. (A and B) Low  
668 magnification of a sagittal section of VEEV-eGFP- (A) and WEEV-eGFP (B) infected mouse brain  
669 showing multiple entry sites for CNS entry. Brain tissues from VEEV-eGFP (C) and WEEV-eGFP (D)  
670 infected mice were stained for makers of astrocytes (S100-β, Magenta), BMECs (CD31, Red), pericytes  
671 (PDGFR-β, Red) and neurons (NeuN, Magenta). Insets are enlarged in lower left of each panel. Single  
672 channels relate to the enlarged insets. Nuclei were counterstained with DAPI (blue). Magnification 40x,  
673 Scale bars: 20 μm.

674

FIG. 3

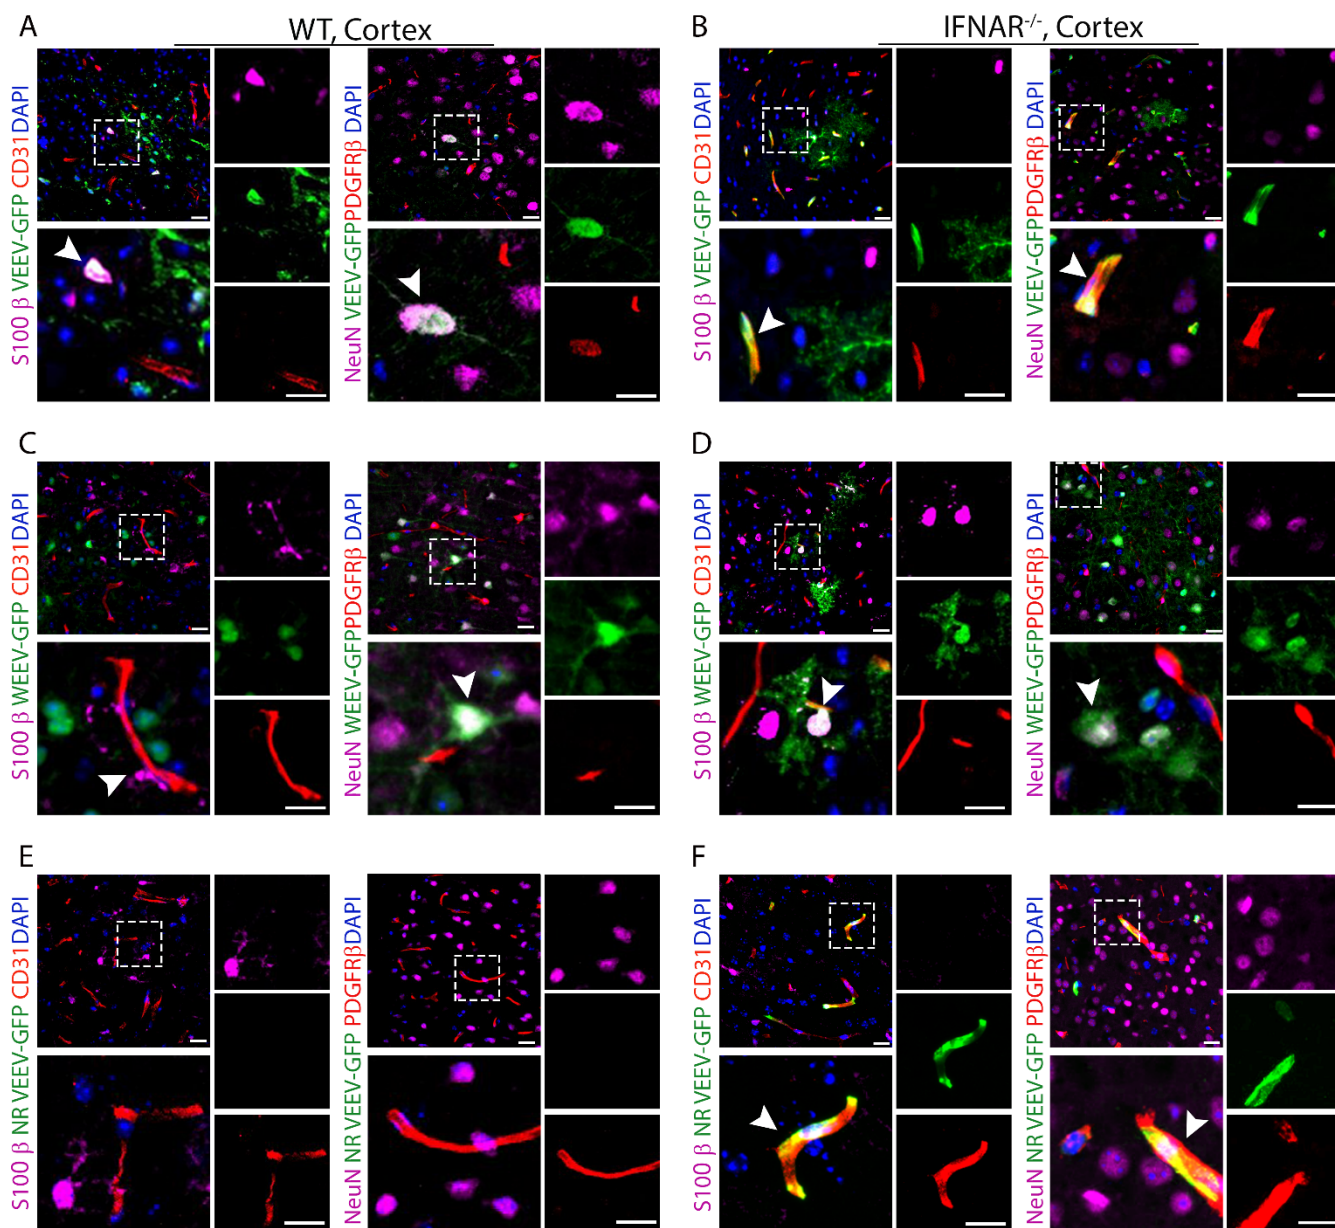

676 **FIG 3** Type I IFNs differentially restrict alphavirus replication within the NVU. IHC staining of cortical  
677 brain regions of WT (A and C) and *Ifnar*<sup>-/-</sup> (B and D) mice following f.p. infection with either VEEV-eGFP  
678 (A and B) or WEEV-eGFP (C and D). Cell markers: astrocytes (S100-β), BMECs (CD31), pericytes  
679 (PDGFR-β) and neurons (NeuN). Nuclei counterstained with DAPI (blue). (E and F) IHC staining of

680 cortical brain regions of WT and *Ifnar*<sup>-/-</sup> mice following i.v. infection with NR-VEEV-eGFP. Magnification

681 40x. Scale bars: 20 μm.

682

FIG. 4

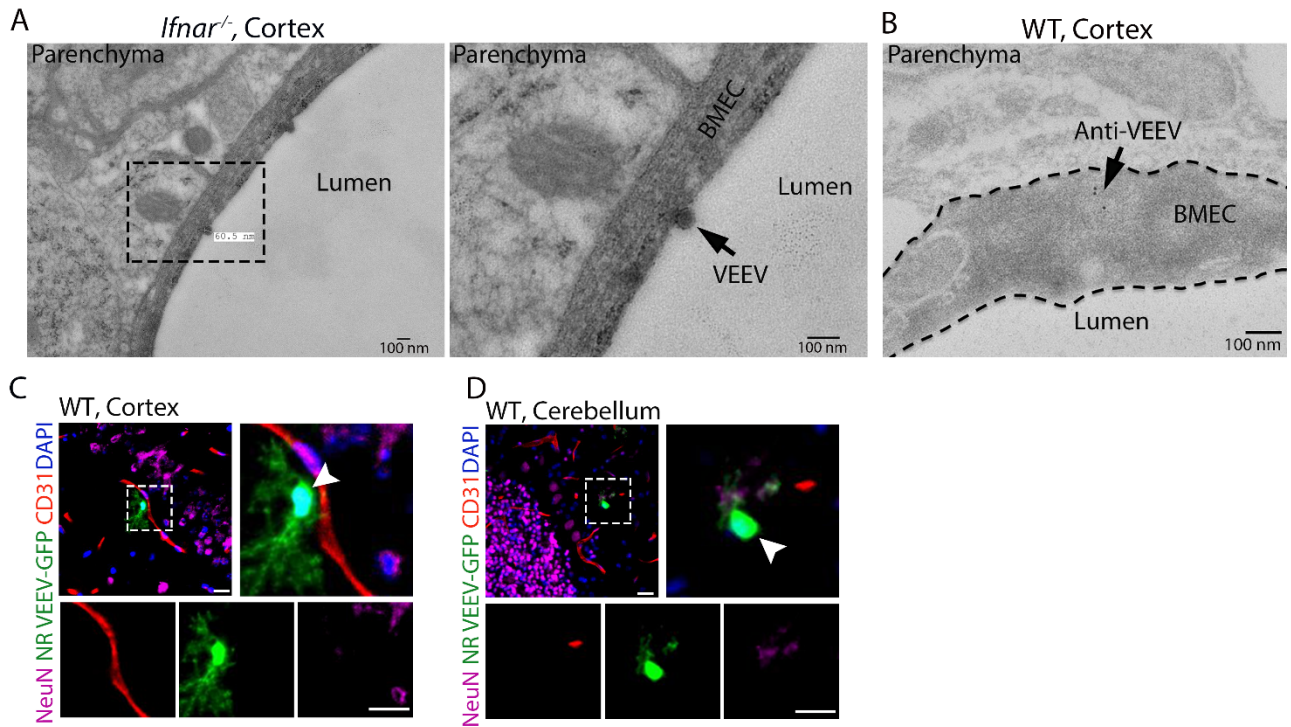

683

684 **FIG 4** Detection of alphavirus interaction and entry at the BBB. (A) TEM analysis of brain tissues from  
685 VEEV infected mice at 1 dpi, identified virus like particles attached to luminal surface of microvessels.  
686 (B) Viral E2 glycoproteins were detected within cortical BMECs of VEEV-eGFP infected mice (3 dpi) by  
687 immune-EM using 8 nm immunogold particles. Scale bars=100 nm. (C and D) Immunostaining of brain  
688 tissues collected from NR VEEV-eGFP infected WT mice at 1 day following i.v. infection. Cell markers:  
689 BMECs (CD31), and neurons (NeuN). Nuclei counterstained with DAPI (blue). Magnification 40x. Scale  
690 bars: 20 μm.





694 compared to vehicle. (D) Quantitation of cell surface-associated caveolae in BMECs after virus  
695 exposure. Statistical differences were analyzed by 1-way ANOVA followed by Dunnett's multiple  
696 comparison test. \*\*\*,  $P < 0.001$ . (E and F) TEM analysis of brain tissues collected from naïve and  
697 VEEV-infected mice at 3 dpi. (G) Quantitation of caveolae-like structures at the cell surface and inside  
698 cytoplasm of brain endothelial cells of naïve vs infected animals. Three tissue blocks were harvested  
699 from cortical brain region of each mouse (N=3 in each group), and 30 images were obtained per block.  
700 After manual counting, the mean vesicular density per length or volume of cytoplasm was calculated  
701 using ImageJ (NIH). Statistical differences were analyzed using t-test. (H) TEM analysis demonstrating  
702 membrane ruffling in BMECs of infected mice relative to control animals.

FIG. 6

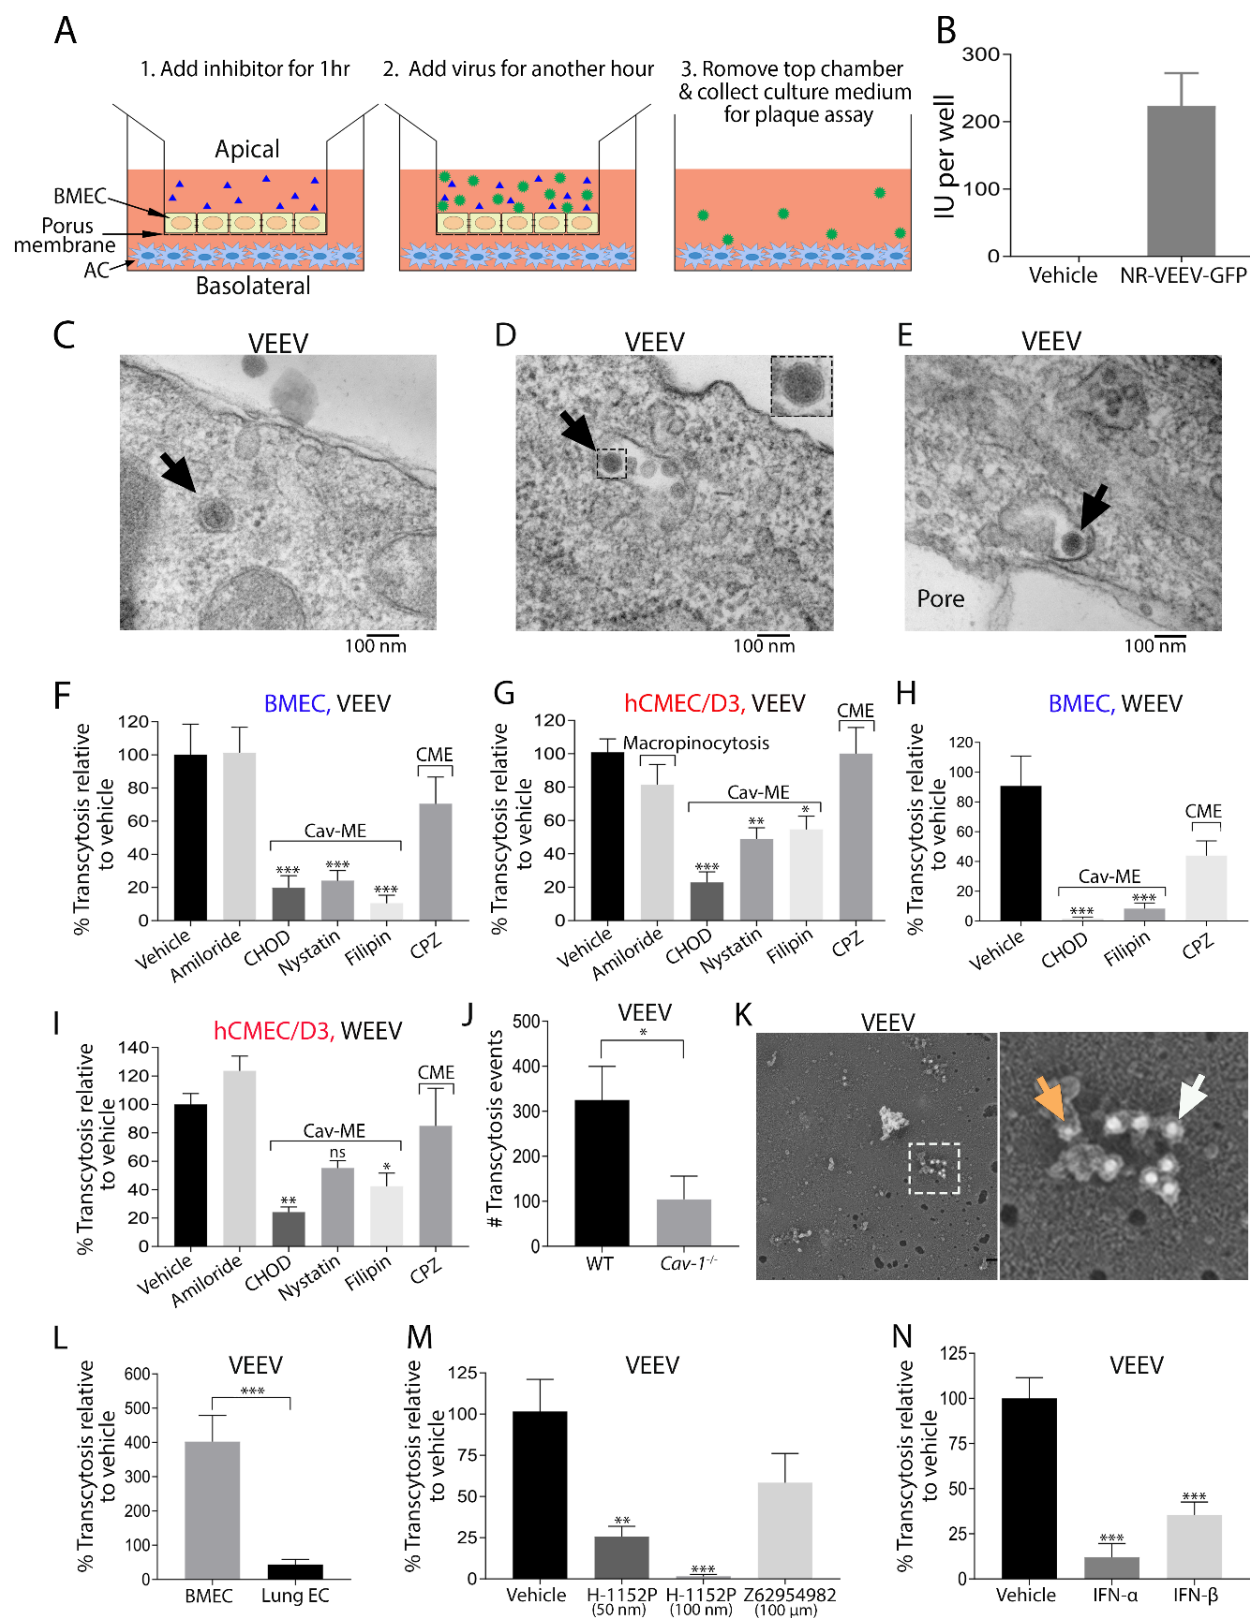

704 **FIG 6** Alphavirus crosses BMECs via caveolae-mediated transcytosis. (A) A schematic figure  
705 demonstrating different steps of a transcytosis assay. (B) Addition of a non-replicative strain of VEEV-  
706 eGFP to hCMEC/D3 on the top chamber resulted in GFP signals in human astrocytes in bottom  
707 chamber. (C-E) TEM analysis identified virus like particles (depicted by arrows) within multi-vesicular  
708 bodies (D) and exotic endosomes (E) in BMECs after exposure to VEEV for 30 min. (F-I) VEEV and  
709 WEEV traverse across monolayers of BMEC (F and H) and hCMEC/D3 (G and I) via caveolae-  
710 mediated transcytosis. Data are presented as mean % of transcytosis relative to untreated cells.  
711 Experiments were repeated 2-3 times each with 4-6 technical replicates. Error bars indicate standard  
712 error of the mean (SEM). Concentration of inhibitors: Amiloride hydrochloride hydrate (50  $\mu$ m),  
713 Cholesterol oxidase (CHOD, 2 U/ml), filipin (1  $\mu$ g/ml), nystatin (12  $\mu$ g/ml), chlorpromazine (CPZ, 10  
714  $\mu$ g/ml). (J) Quantitation of VEEV transcytosis across WT and *Cav-1*<sup>-/-</sup> BMECs. (K) Immunogold labeling  
715 of virally infected BMECs revealed VEEV (8 nm immunogold particles; orange arrow) in colocalization  
716 with caveoline-1 (16 nm immunogold particles; white arrow). (L) VEEV transcytosis was compared  
717 between brain and lung ECs. (M and N) VEEV transcytosis across BMECs in the absence and  
718 presence of Rho kinase GTPase (H-1152P) and Rac1 (Z62954982), as well as type I IFNs (100 pg/ml).  
719 Results from transcytosis assays were analyzed by 1-way ANOVA (F-I, M and N), and t-test (J and L).  
720 \*,  $P < 0.05$ , \*\*,  $P < 0.01$ ; \*\*\*,  $P < 0.001$ .

721

722

723

724

725



726

FIG. 7

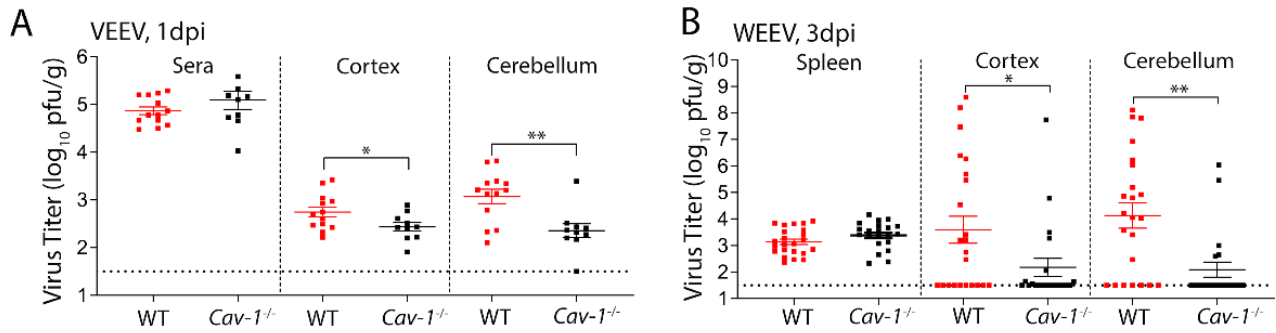

727

728 **FIG 7** Cav-1<sup>-/-</sup> mice displayed reduced viral titers in the brain as compared to WT animals. (A and B)

729 Viral burdens in peripheral and brain tissues of WT vs Cav-1 KO mice after f.p. infection with VEEV

730 (10 pfu) and WEEV (1000 pfu), determined by plaque assay. Error bars indicate standard error of the

731 mean (SEM). Shown is the combined data from 4 independent experiments each with 4-6 animals.

732 Results were analyzed by unpaired t-test. \*, P < 0.05; \*\*, P < 0.01.

733

734

735

736

737

738

739

740

741

742 **Supplementary Figures:**

FIG. S1

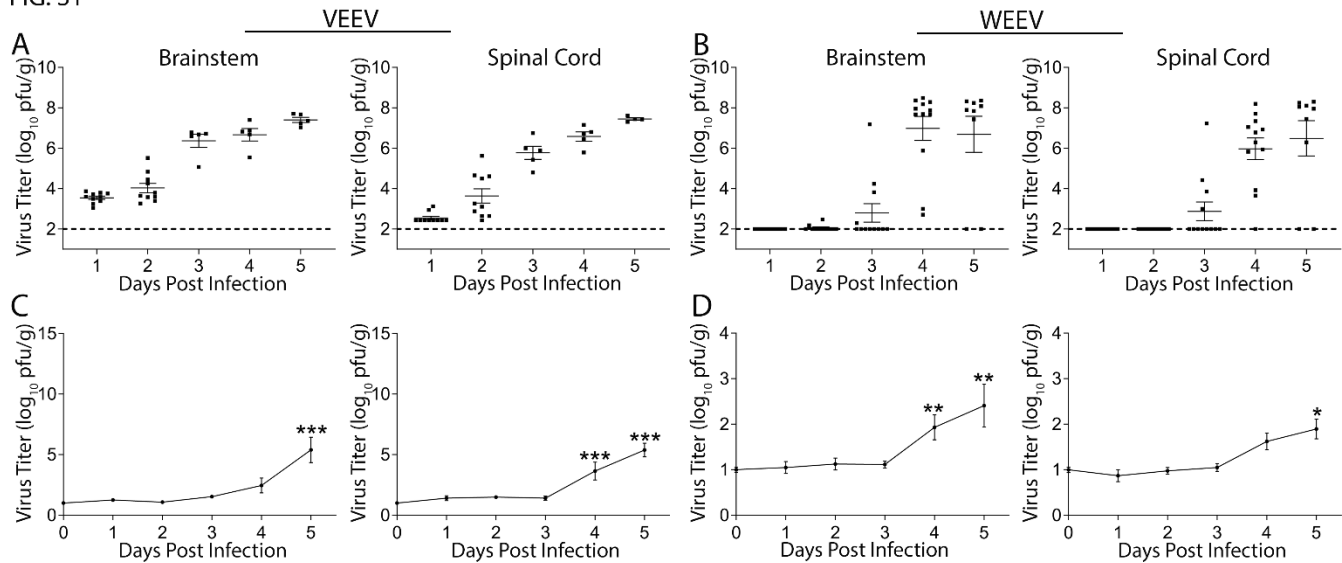

743

744 **FIG S1** Alphavirus enters the CNS in the presence of an intact BBB. (A and B) Viral burdens in brain  
745 tissues of C57BL/6 mice following f.p. infection with either VEEV (10 PFU) or WEEV (1000 pfu) were  
746 determined via plaque assay. Dashed lines indicates detection limit of the assay. (C and D) BBB  
747 permeability was evaluated at indicated dpi by measuring sodium fluorescein in CNS tissues following  
748 i.p. injection. Results are the combined data of two independent experiments. Data presented as mean  
749 viral titer or fluorescence  $\pm$  SEM for N=5-10 mice/group. \*,  $P < 0.05$ , \*\*,  $P < 0.01$ ; \*\*\*,  $P < 0.001$ , via 1-  
750 way ANOVA.

FIG. S2

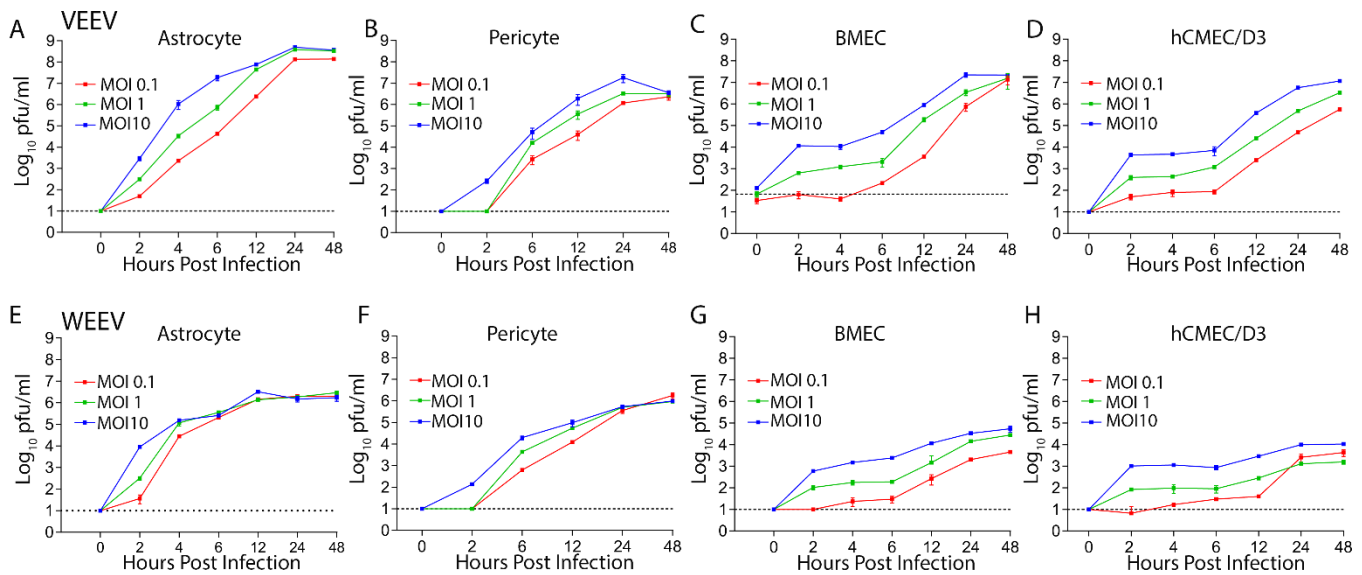

751

752 **FIG S2** Cells of the neurovascular unit are permissive to alphavirus infection *in vitro*. Replication kinetic  
753 of VEEV and WEEV in murine (A-C, and E-G) and human cells (D and H) of the NVU. Multi-step growth  
754 curves were generated using Graphpad Prism 7. Shown is a representative data from three  
755 independent experiments each in duplicates.

756

FIG. S3

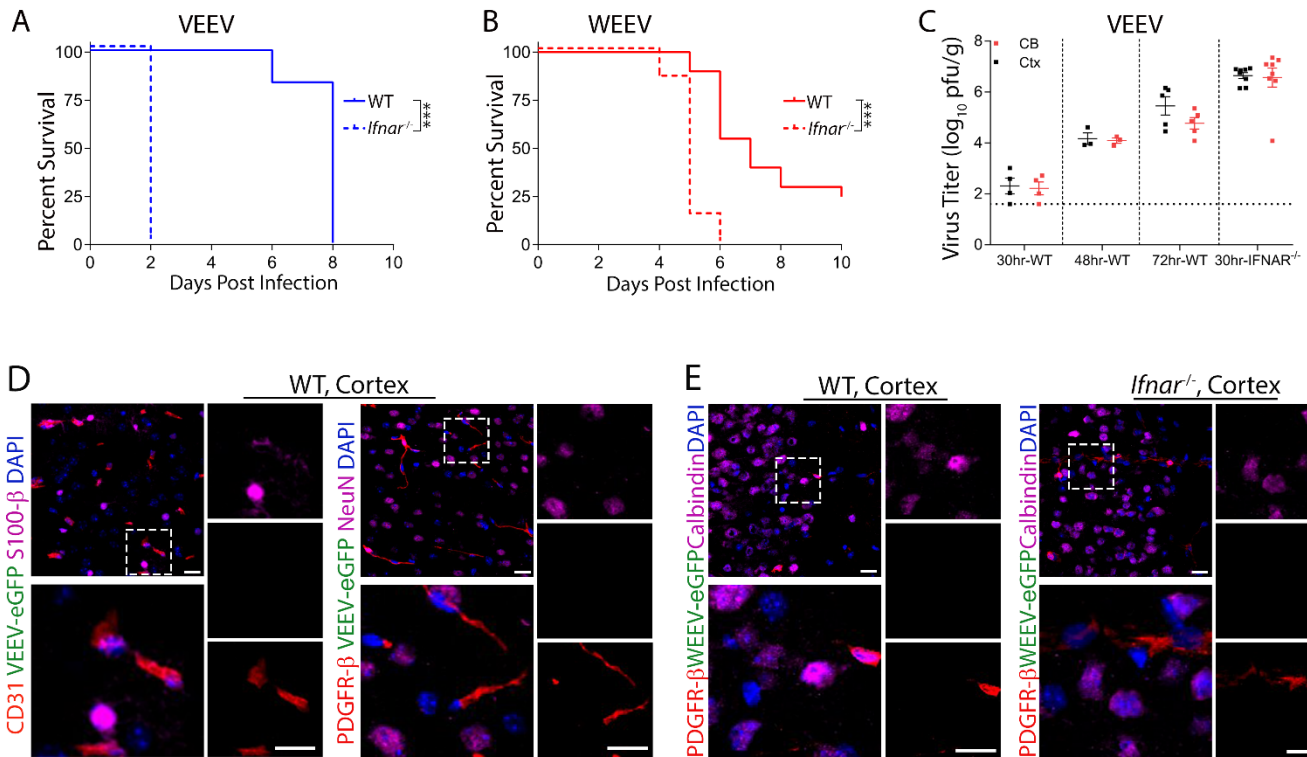

757

758 **FIG S3** Survival phenotype of WT and *Ifnar*<sup>-/-</sup> mice following alphavirus infection. (A and B) WT and  
759 *Ifnar*<sup>-/-</sup> mice were infected with VEEV (10 pfu) and WEEV (1000 pfu) via foot-pad injection. Infected  
760 animals were monitored for survival and weight loss for 20 days. Shown is the combined data from 2  
761 independent experiments with 3-4 animals each time. (C) Viral titers in the brain of WT versus *Ifnar*<sup>-/-</sup>  
762 following infection with VEEV-eGFP (100 pfu) at indicated time-point. (D and E) IHC examining of brain  
763 tissues collected from infected WT (D) and *Ifnar*<sup>-/-</sup> (E) mice at 1 dpi. Cell markers: astrocytes (S100-β),  
764 BMECs (CD31), pericytes (PDGFR-β) and neurons (NeuN). Nuclei counterstained with DAPI (blue).  
765 Magnification 40x. Scale bar: 20 μm.

766

767

FIG. S4

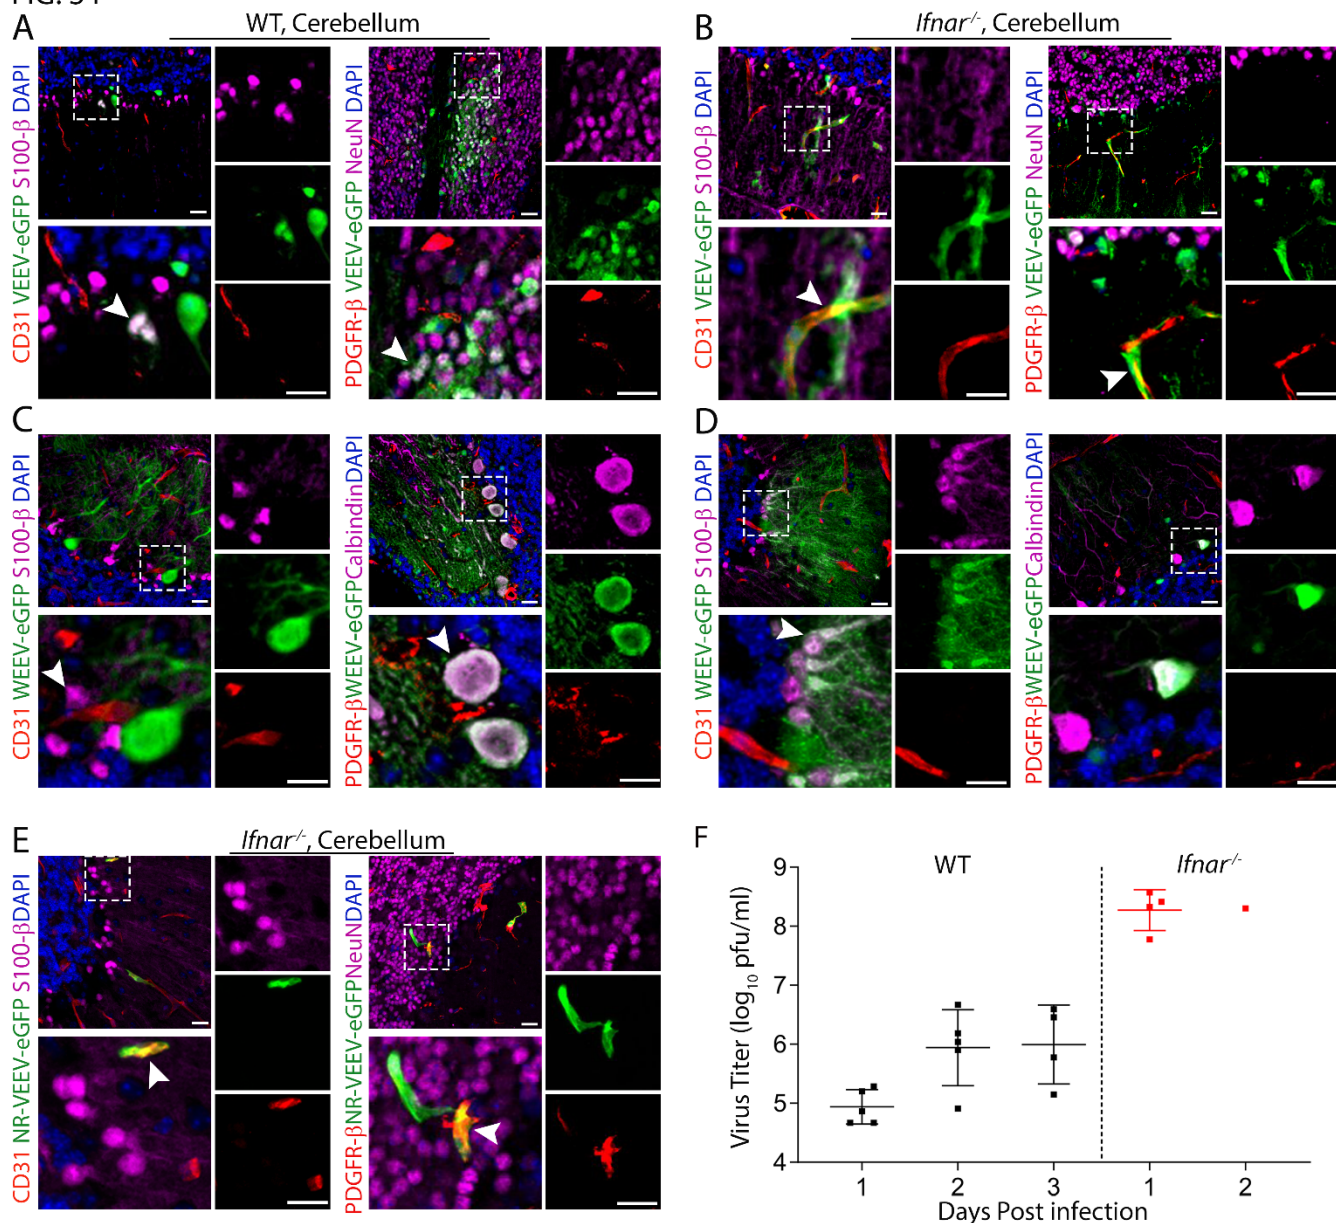

768

769 **FIG S4** IFN-mediated restriction of alphavirus within NVU is uniform across the brain. IHC staining of  
 770 brain tissues from WT (3dpi; A and C) and *Ifnar*<sup>-/-</sup> (2 dpi; B and D) mice infected with either 100 pfu of  
 771 VEEV-eGFP (A and B) or 1000 pfu of WEEV-eGFP via f.p. injection (C and D). Cerebellum sections  
 772 were stained for markers of astrocytes (S100-β), BMECs (CD31), pericytes (PDGFR-β) and neurons

773 (NeuN or Calmodulin). Nuclei counterstained with DAPI (blue). Magnification 40x. Scale bars: 20  $\mu$ m.  
774 (E) Infection of cerebral BMECs and pericytes in *Ifnar*<sup>-/-</sup> mice following *i.v.* infection with a non-  
775 replicative (NR) replicon of VEEV-eGFP. (F) Serum titers of VEEV in WT versus IFNAR<sup>-/-</sup> mice following  
776 f.p. infection.

777

FIG. S5

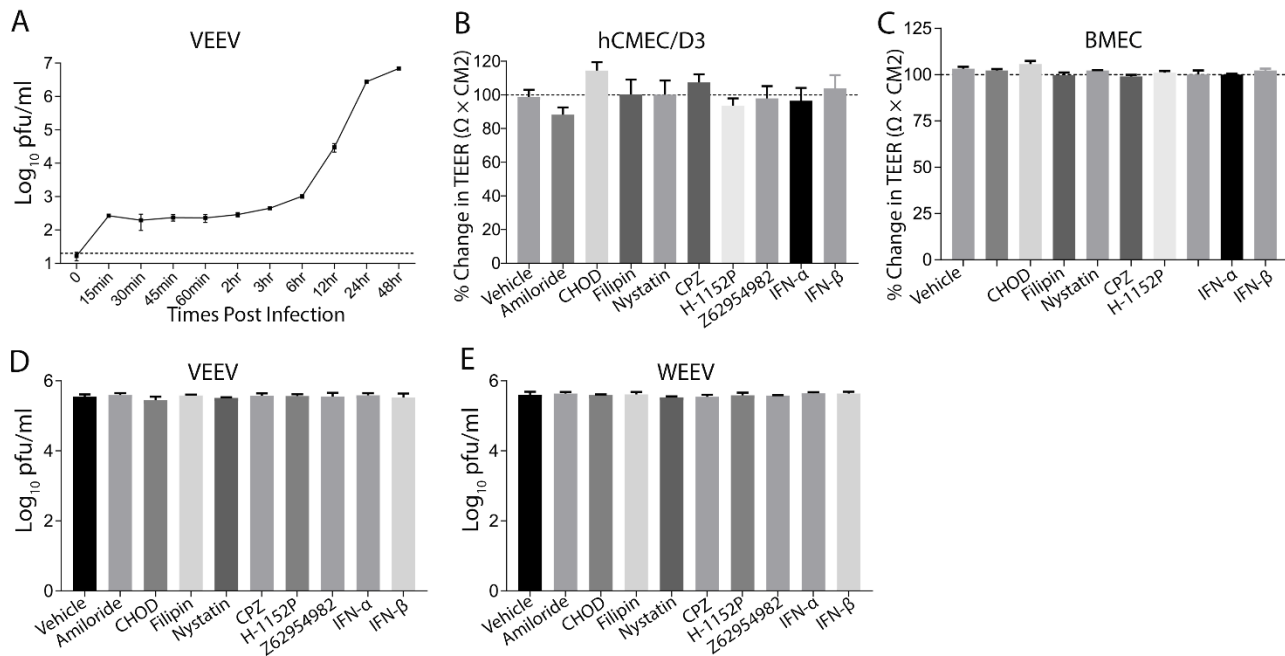

778

779 **FIG S5** Replication kinetics of VEEV in BMECs. (A) BMECs were infected with VEEV at a MOI of 2 for  
780 30 min. After extensive washes, virus production was assayed in the culture medium at indicated time-  
781 points using plaque assay. (B and C) Effects of inhibitors of endocytic pathways on barrier integrity,  
782 which was determined by measuring TEER before and after addition of inhibitors to BMECs on the top  
783 chamber of a transwell plate. (D and E) Effects of endocytosis inhibitors on virus infectivity. Viruses  
784 were incubated with inhibitors or vehicle for 1 hr, followed by assessment of virus infectivity using  
785 plaque assay in BHK-21 (VEEV) or Vero (WEEV) cell lines. Drug concentrations: Amiloride  
786 hydrochloride hydrate (50  $\mu\text{m}$ ), Cholesterol oxidase (CHOD, 2 U/ml), filipin (1  $\mu\text{g}/\text{ml}$ ), nystatin (12  
787  $\mu\text{g}/\text{ml}$ ), chlorpromazine (CPZ, 10  $\mu\text{g}/\text{ml}$ ), H-1152P (50 nm, 100 nm), Z62954982 (100  $\mu\text{M}$ ), IFN- $\alpha$  (100  
788 pg/ml), IFN- $\beta$  (100 pg/ml).

789

790

FIG. S6

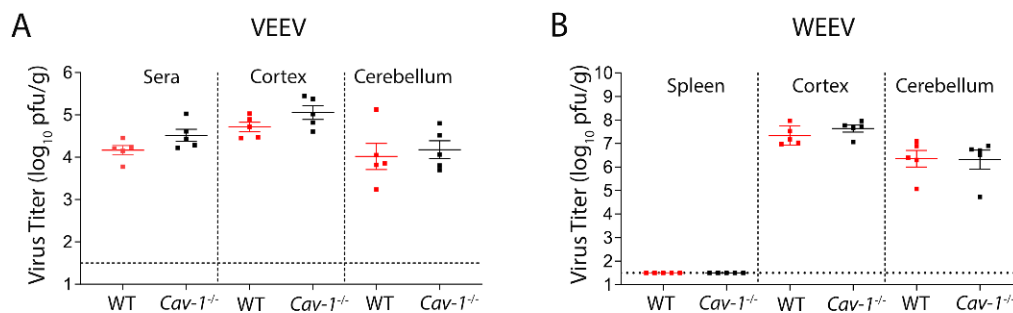

791

792 **FIG S6** Difficiency in *Cav-1* does not affect alphavirus replication efficiency within the CNS. (A and B)

793 Viral titers in peripheral and brain tissues of WT vs *Cav-1*<sup>-/-</sup> mice at 1dpi following i.c. infection with

794 VEEV (10 PFU) and WEEV (100 pfu). Error bars indicate standard error of the mean (SEM).

795

796
